# Supplementary material for: Construction of pyrazole fused spiroketals by a (3 + 2) annulation reaction
Source: Royal Society of Chemistry journal article supplement (doi:10.1039/d2qo01001a), 2022-01-01

## Construction of pyrazole fused spiroketals by a (3 + 2) annulation reaction

Wande Zhang, Xingfu Wei, Yue Wang, Yue Huang, Shah Nawaz, Jingping Qu and  
Baomin Wang\*

State Key Laboratory of Fine Chemicals, Department of Pharmaceutical Sciences, School of  
Chemical Engineering, Dalian University of Technology, Dalian 116024, People's Republic of  
China. E-mail: bmwang@dlut.edu.cn

### Content

1. Characterization of enantiomeric excess for the asymmetric (3 + 2) annulation product. .... S1
2. NMR spectra for compounds **3aa-3am**..... S5

## 1. Characterization of enantiomeric excess for the asymmetric (3 + 2) annulation product

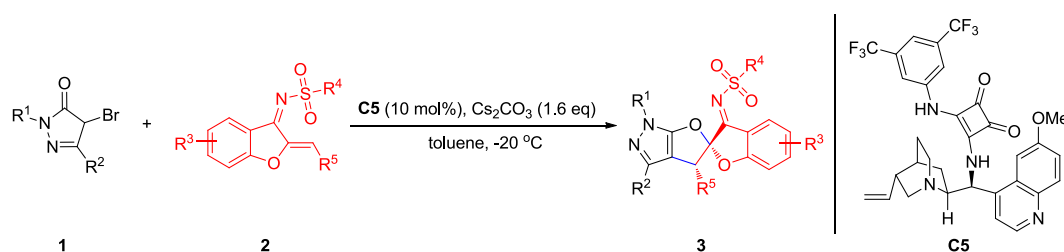

A Schlenk tube equipped with a magnetic stir bar was charged with 4-bromo pyrazolone **1** (0.15 mmol, 1.5 equiv.), benzofuran-derived azadiene **2** (0.10 mmol, 1.0 equiv.), **C5** (10 mol%), toluene (1 mL) under nitrogen atmosphere at -20 °C. After stirring for 3-5 min, Cs<sub>2</sub>CO<sub>3</sub> (0.16 mmol, 1.6 equiv.) was added. The resulting mixture was stirred at -20 °C. Progress of the reaction was monitored by TLC. After completion of the reaction, the crude product was purified by column chromatography (petroleum ether/ethyl acetate = 10/1-5/1) on silica gel to give the product **3**.

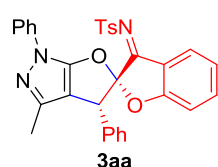

Prepared according to the procedure within 10 min as a light yellow solid (89% yield, dr > 20:1); **Enantiomeric excess** was determined to be 79% (determined by HPLC using chiral OD-H column, hexane/2-propanol = 95/5,  $\lambda = 254 \text{ nm}$ , 30 °C, 0.8 mL/min,  $t_{\text{major}} = 20.3 \text{ min}$ ,  $t_{\text{minor}} = 25.0 \text{ min}$ ).

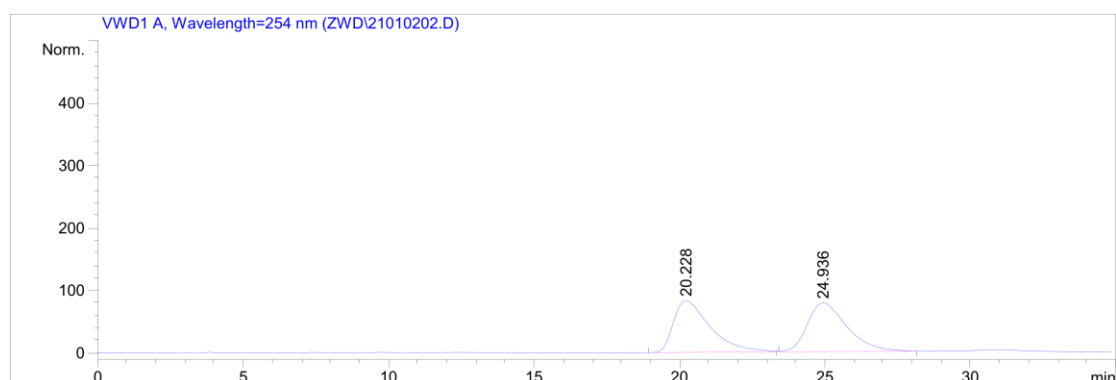

| Peak # | RetTime [min] | Type | Width [min] | Area mAU * s | Height [mAU] | Area %  |
|--------|---------------|------|-------------|--------------|--------------|---------|
| 1      | 20.228        | BB   | 1.3089      | 7286.44531   | 82.70372     | 49.6302 |
| 2      | 24.936        | BB   | 1.3968      | 7395.02686   | 77.72697     | 50.3698 |

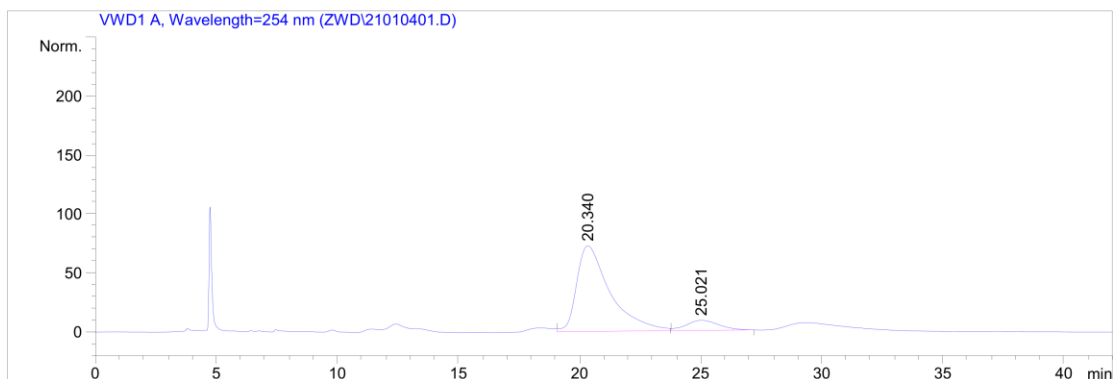

| Peak # | RetTime [min] | Type | Width [min] | Area mAU * s | Height [mAU] | Area %  |
|--------|---------------|------|-------------|--------------|--------------|---------|
| 1      | 20.340        | VB   | 1.3985      | 7000.15967   | 72.79925     | 89.4386 |
| 2      | 25.021        | BB   | 1.1640      | 826.61804    | 8.69824      | 10.5614 |

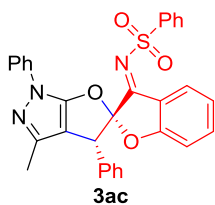

Prepared according to the procedure within 2 h as a light yellow solid (43% yield, dr > 20:1); **Enantiomeric excess** was determined to be 42% (determined by HPLC using chiral OD-H column, hexane/2-propanol = 90/10,  $\lambda = 254$  nm, 30 °C, 0.8 mL/min,  $t_{\text{minor}} = 14.9$  min,  $t_{\text{major}} = 16.6$  min).

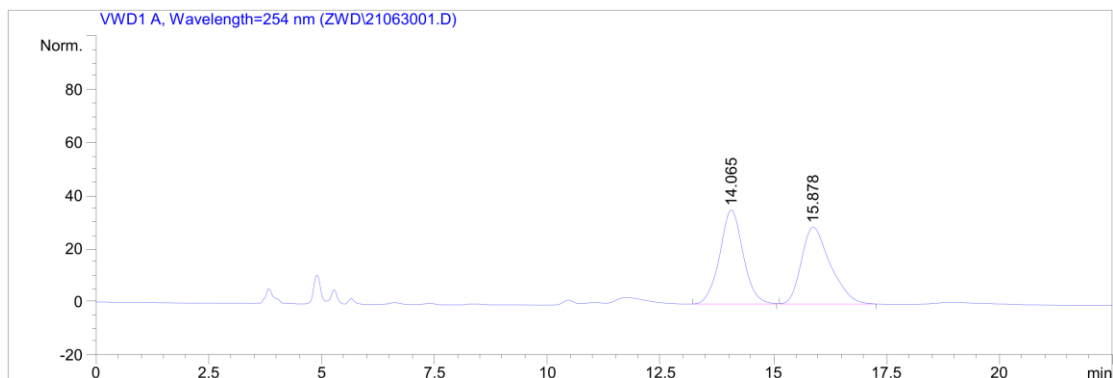

| Peak # | RetTime [min] | Type | Width [min] | Area mAU * s | Height [mAU] | Area %  |
|--------|---------------|------|-------------|--------------|--------------|---------|
| 1      | 14.065        | BB   | 0.5465      | 1285.19141   | 35.47011     | 49.8705 |
| 2      | 15.878        | BB   | 0.6595      | 1291.86426   | 28.99769     | 50.1295 |

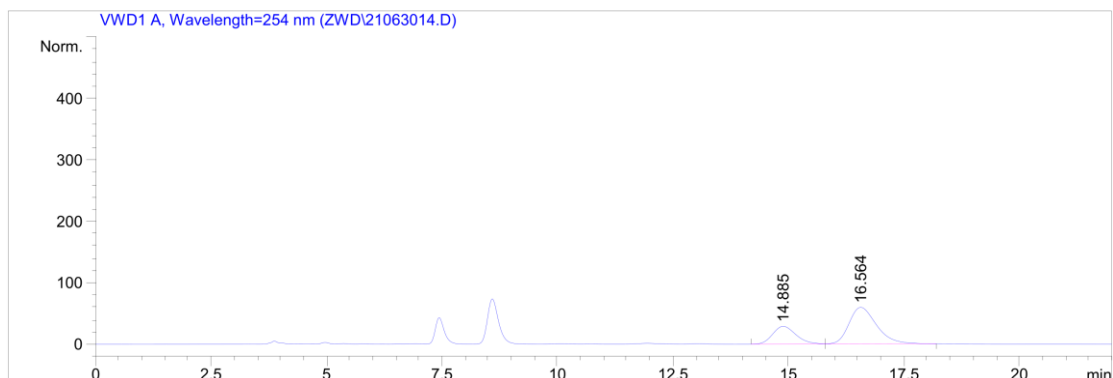

| Peak # | RetTime [min] | Type | Width [min] | Area mAU *s | Height [mAU] | Area %  |
|--------|---------------|------|-------------|-------------|--------------|---------|
| 1      | 14.885        | BV   | 0.5373      | 1021.19128  | 29.01307     | 29.1134 |
| 2      | 16.564        | VB   | 0.6415      | 2486.44214  | 59.71934     | 70.8866 |

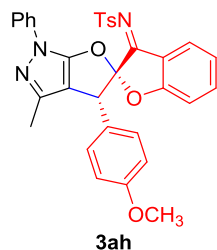

Prepared according to the procedure within 4 h as a light yellow solid (72% yield, dr > 20:1); **Enantiomeric excess** was determined to be 89% (determined by HPLC using chiral OD-H column, hexane/2-propanol = 90/10,  $\lambda = 254$  nm, 30 °C, 0.8 mL/min,  $t_{\text{major}} = 14.2$  min,  $t_{\text{minor}} = 29.9$  min)

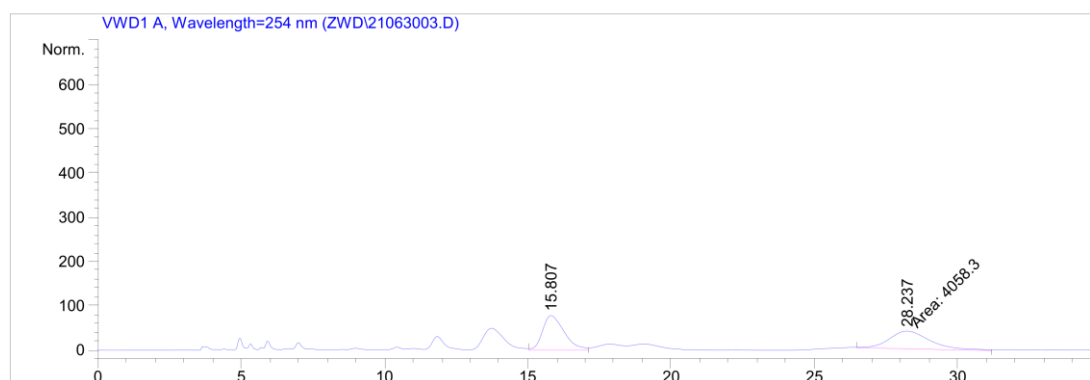

| Peak # | RetTime [min] | Type | Width [min] | Area mAU *s | Height [mAU] | Area %  |
|--------|---------------|------|-------------|-------------|--------------|---------|
| 1      | 15.807        | VV   | 0.7886      | 4105.42871  | 78.01667     | 50.2887 |
| 2      | 28.237        | MM   | 1.6787      | 4058.29590  | 40.29240     | 49.7113 |

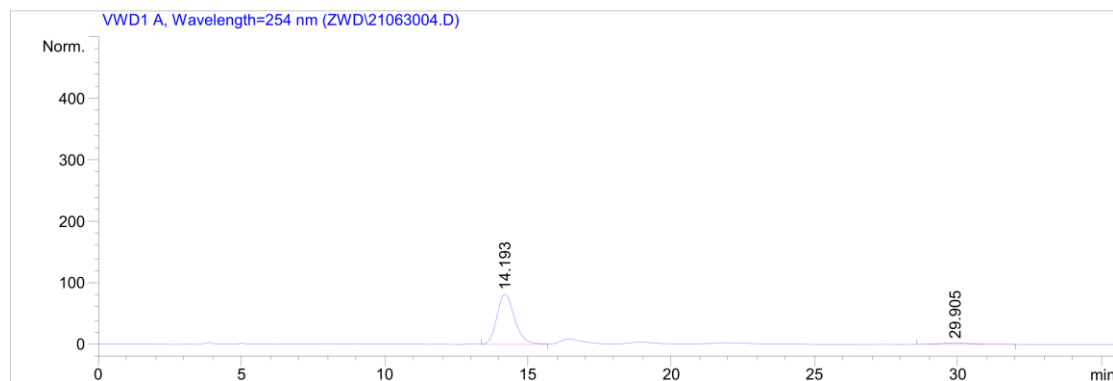

| Peak # | RetTime [min] | Type | Width [min] | Area mAU *s | Height [mAU] | Area %  |
|--------|---------------|------|-------------|-------------|--------------|---------|
| 1      | 14.193        | VB   | 0.6575      | 3530.92139  | 81.86845     | 94.5040 |
| 2      | 29.905        | BB   | 1.0376      | 205.34433   | 2.35166      | 5.4960  |

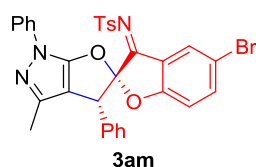

Prepared according to the procedure within 11 h as a light yellow solid (22% yield, dr > 20:1); **Enantiomeric excess** was determined to be 37% (determined by HPLC using chiral OD-H column, hexane/2-propanol = 90/10,  $\lambda = 254$  nm, 30 °C, 0.8 mL/min,  $t_{\text{major}} =$

9.5 min,  $t_{\text{minor}} = 12.2$  min)

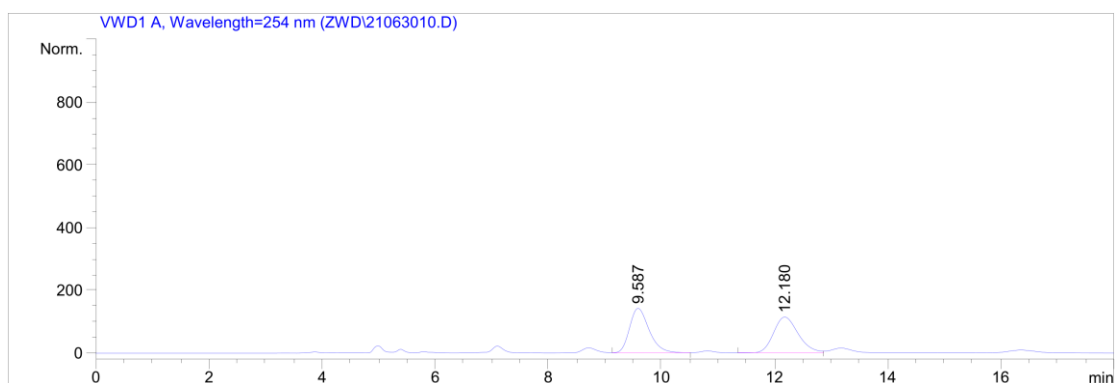

| Peak # | RetTime [min] | Type | Width [min] | Area mAU * s | Height [mAU] | Area %  |
|--------|---------------|------|-------------|--------------|--------------|---------|
| 1      | 9.587         | VV   | 0.3719      | 3456.73706   | 142.46994    | 49.9520 |
| 2      | 12.180        | VV   | 0.4689      | 3463.38159   | 114.18127    | 50.0480 |

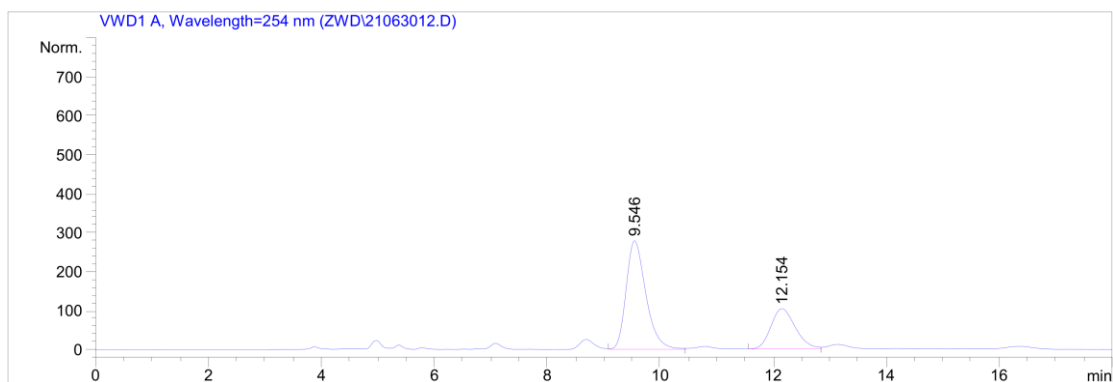

| Peak # | RetTime [min] | Type | Width [min] | Area mAU * s | Height [mAU] | Area %  |
|--------|---------------|------|-------------|--------------|--------------|---------|
| 1      | 9.546         | VV   | 0.3719      | 6774.60840   | 279.19775    | 68.2734 |
| 2      | 12.154        | BV   | 0.4675      | 3148.16162   | 103.77524    | 31.7266 |

## 2. NMR spectra for compounds 3aa-3am

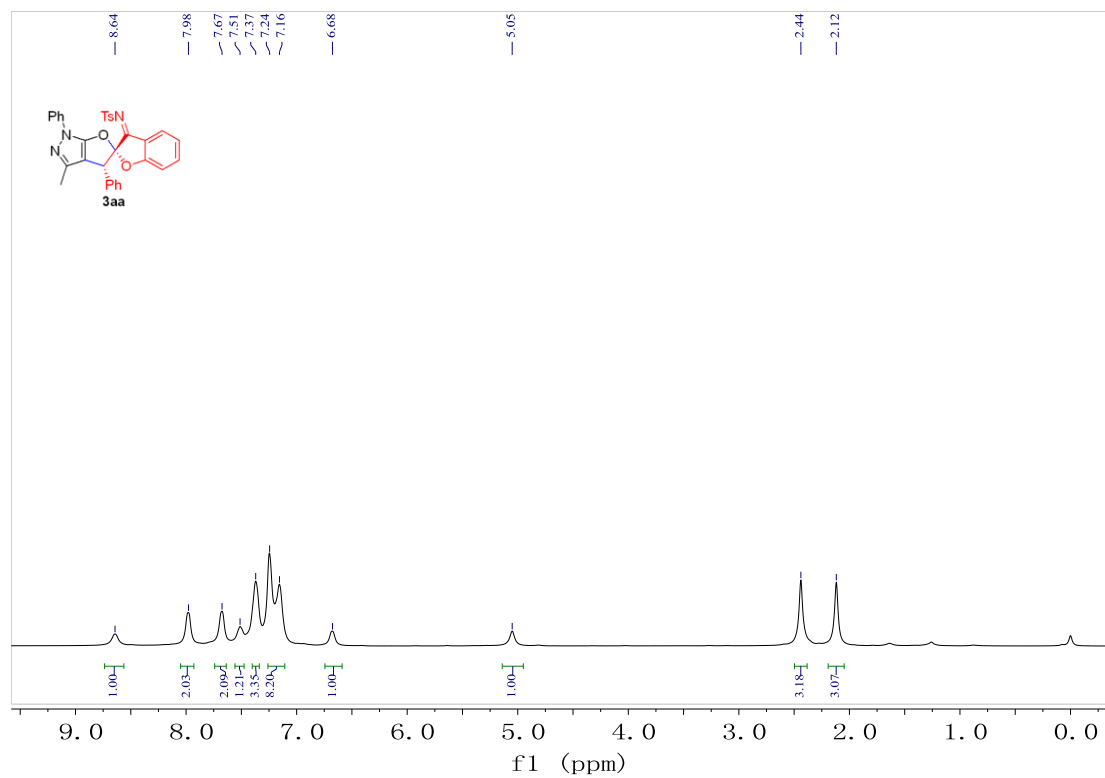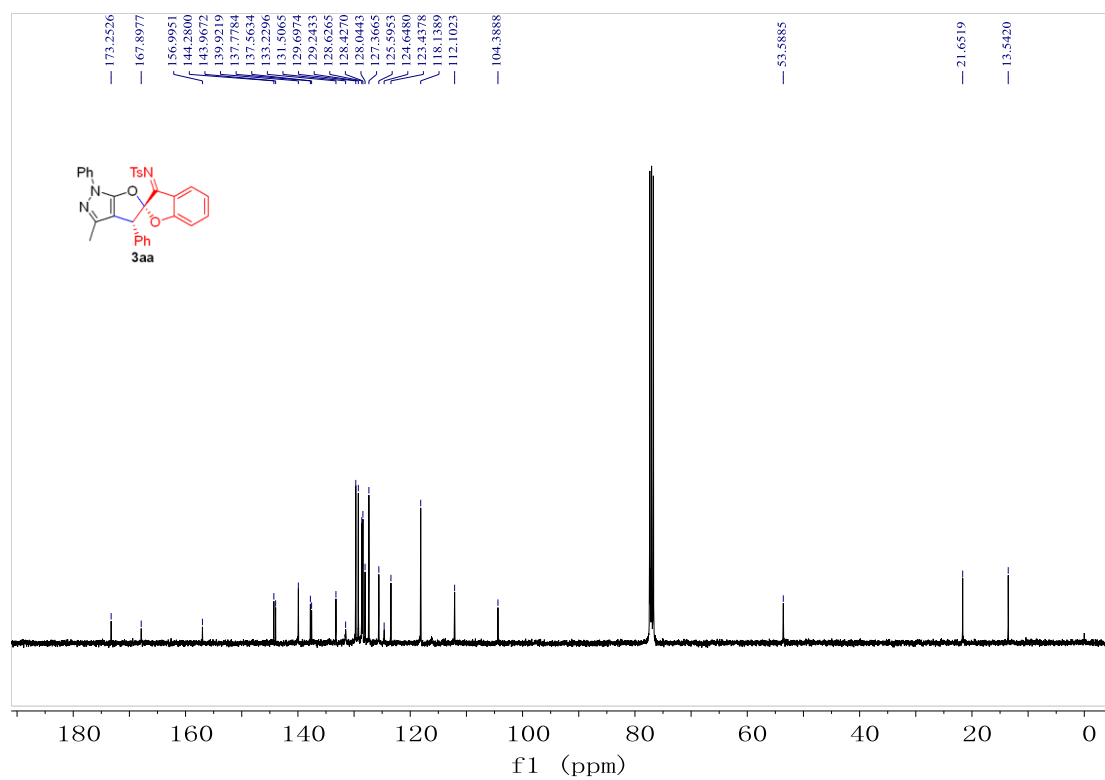

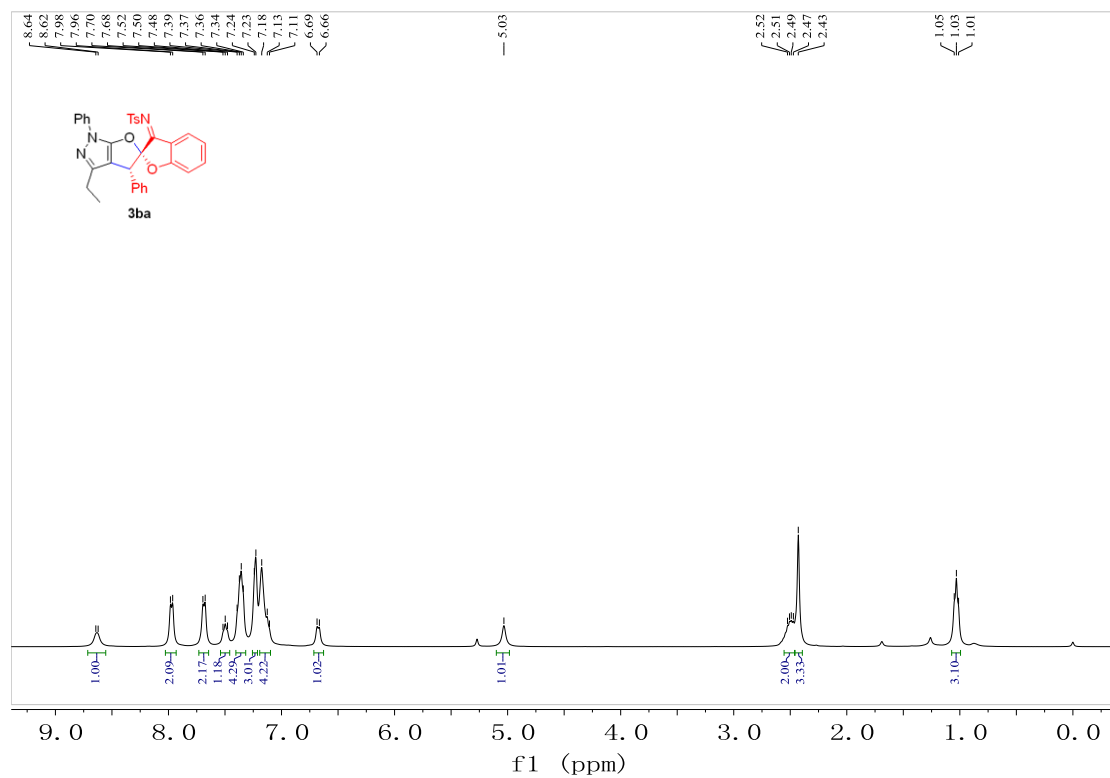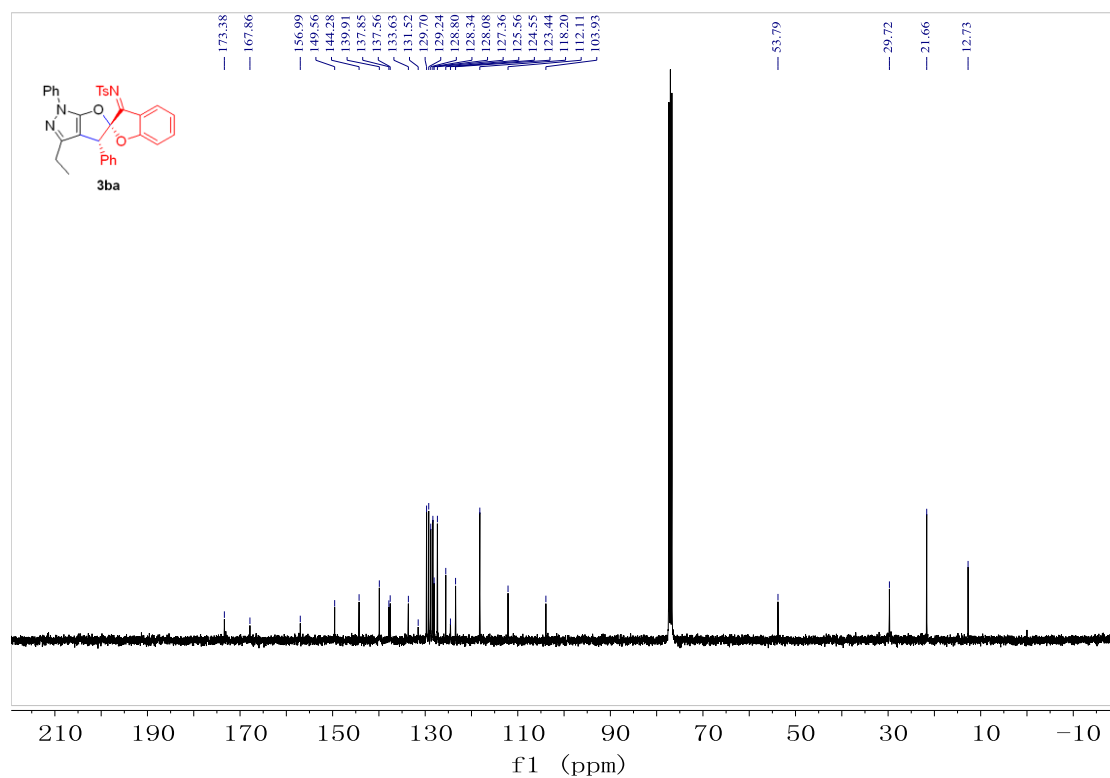

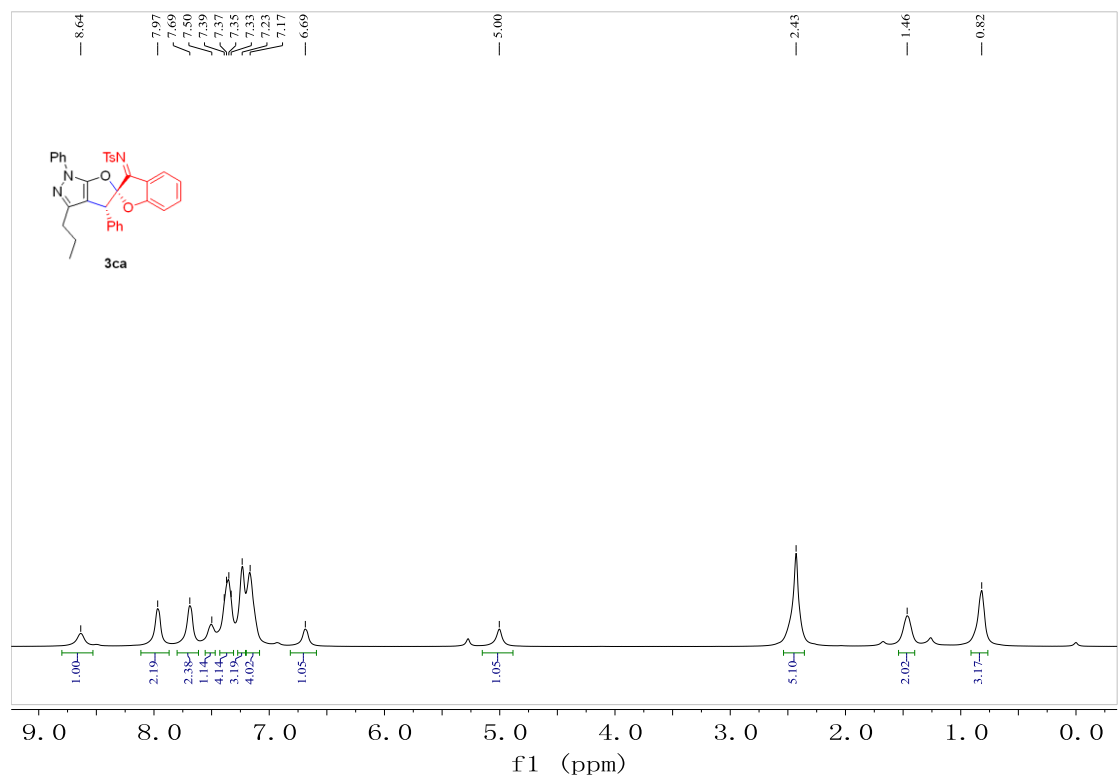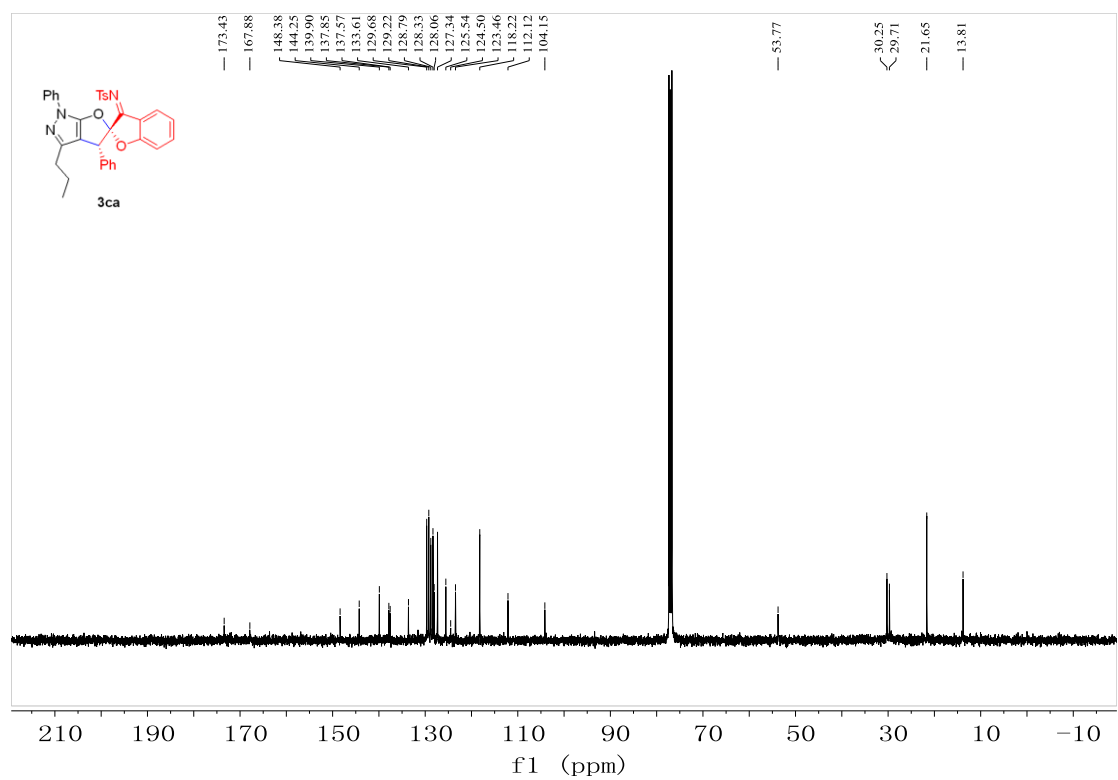



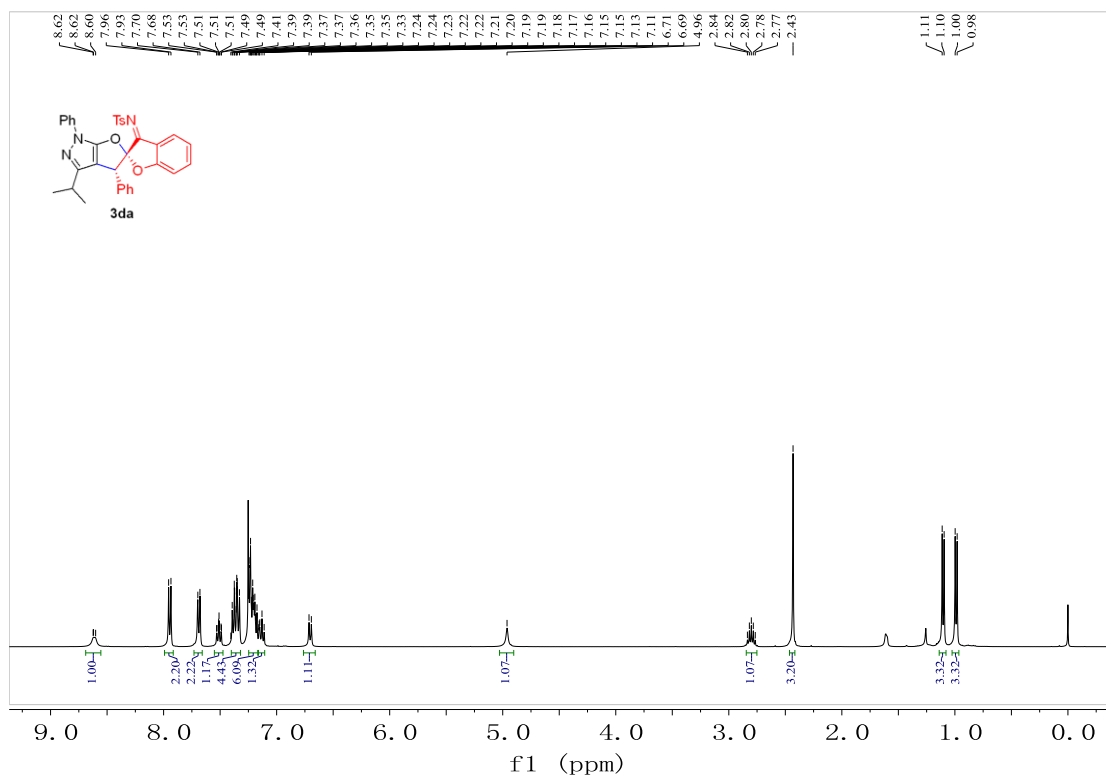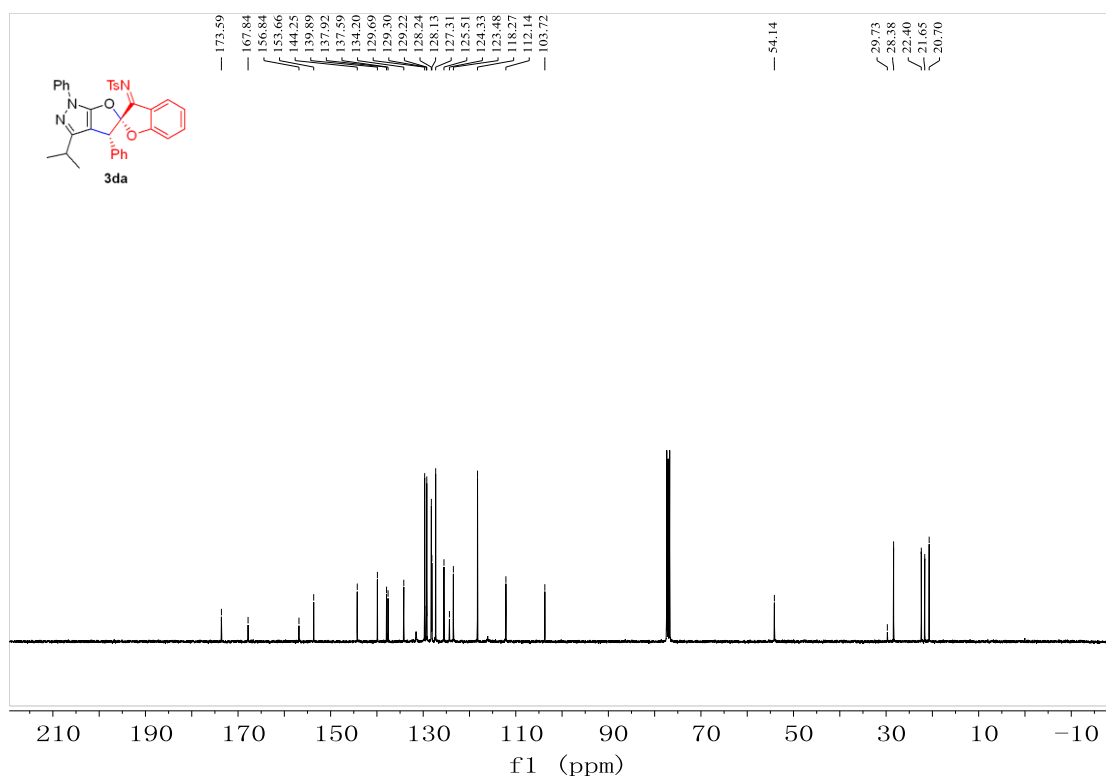

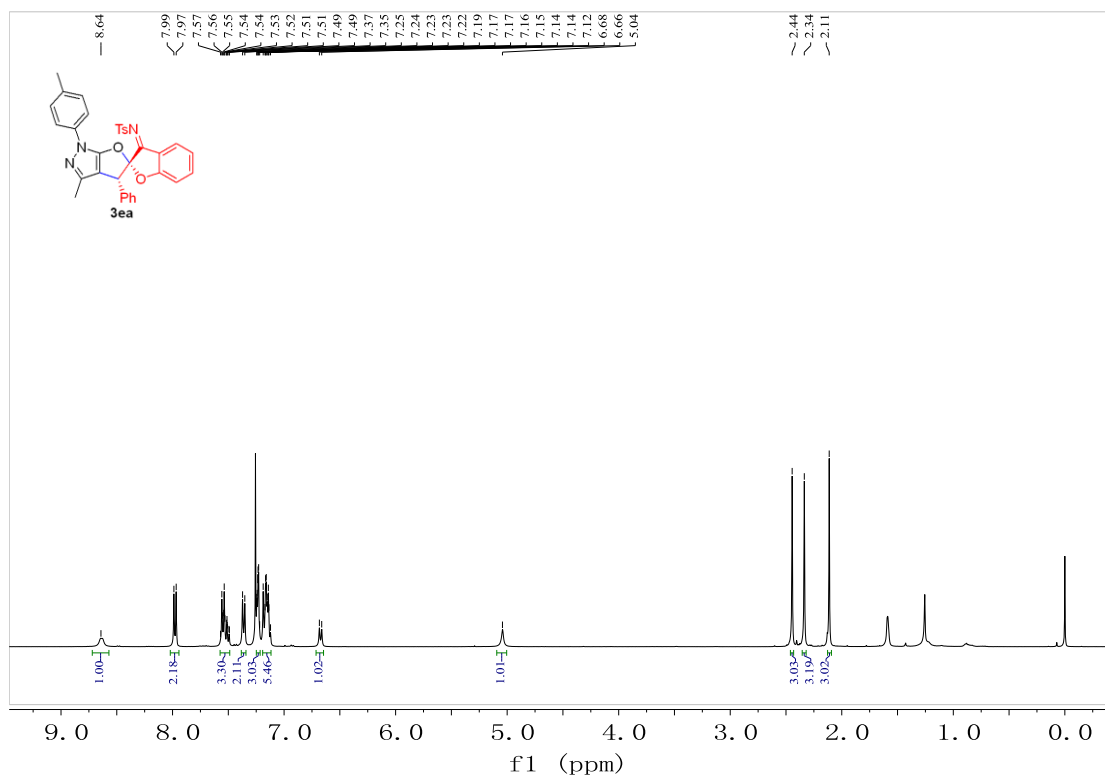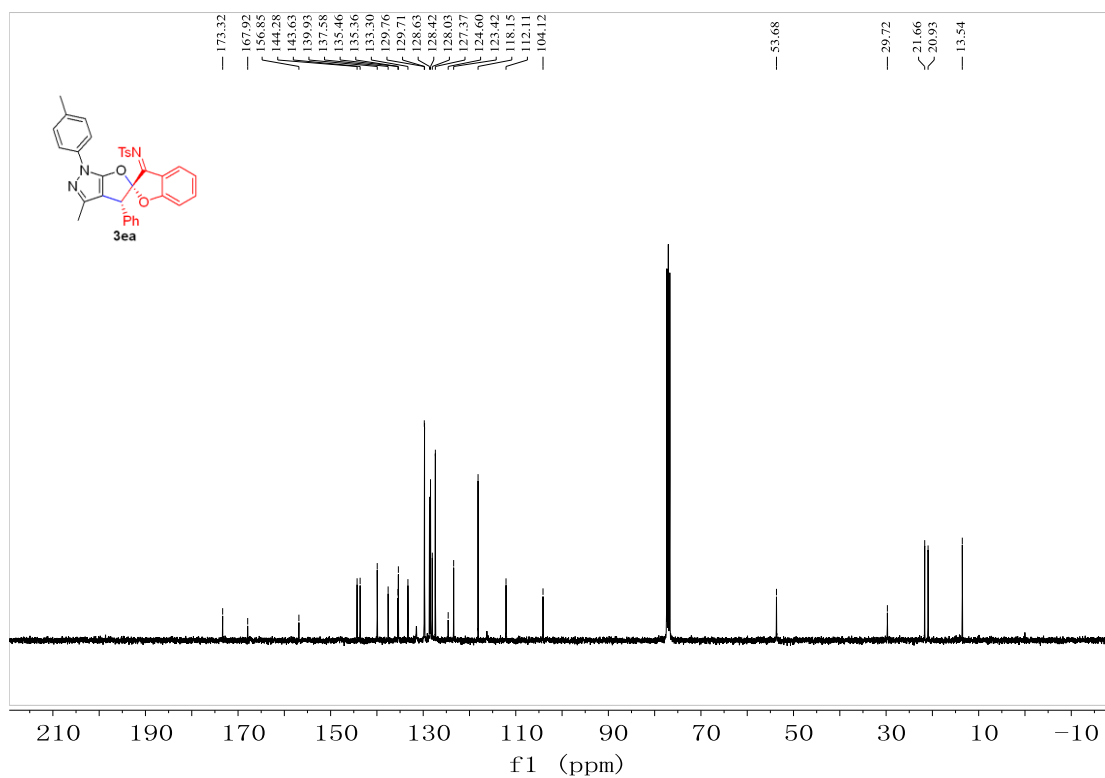

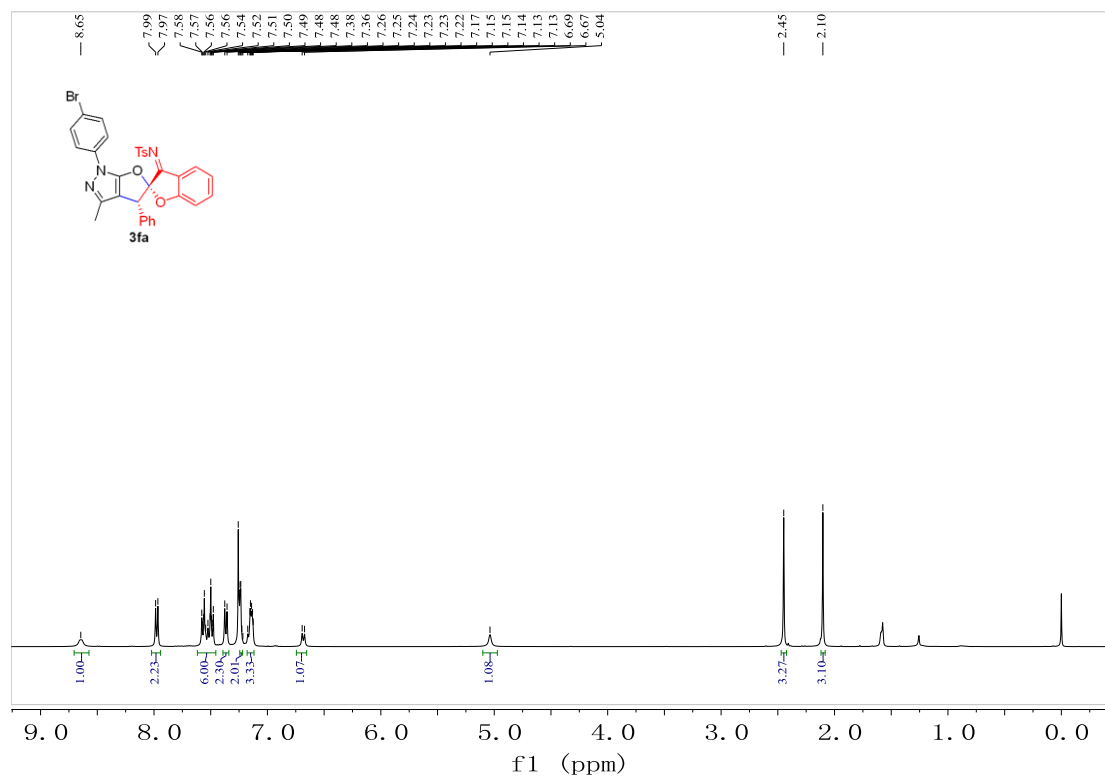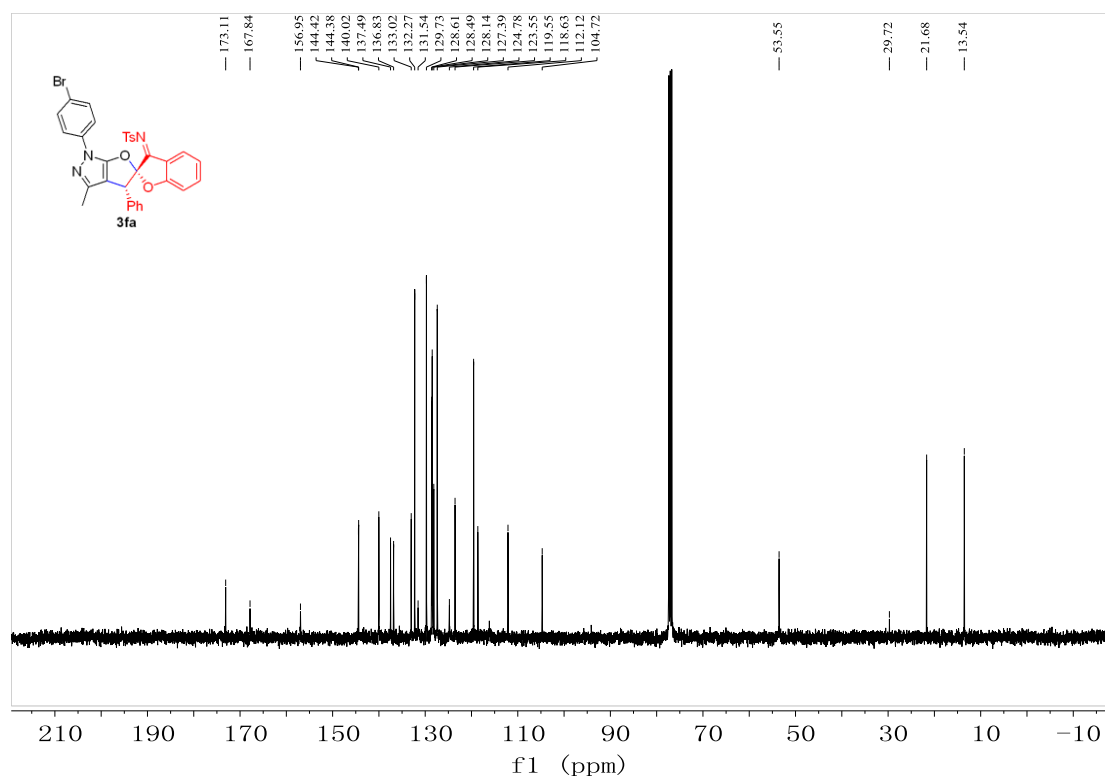

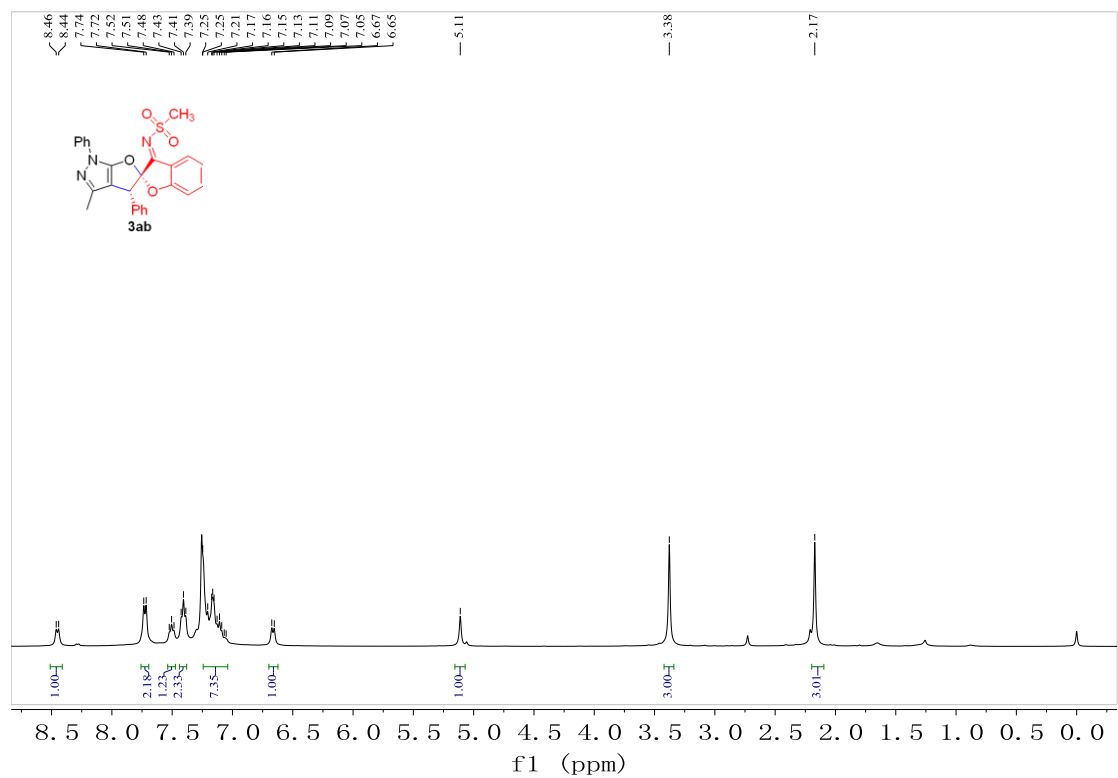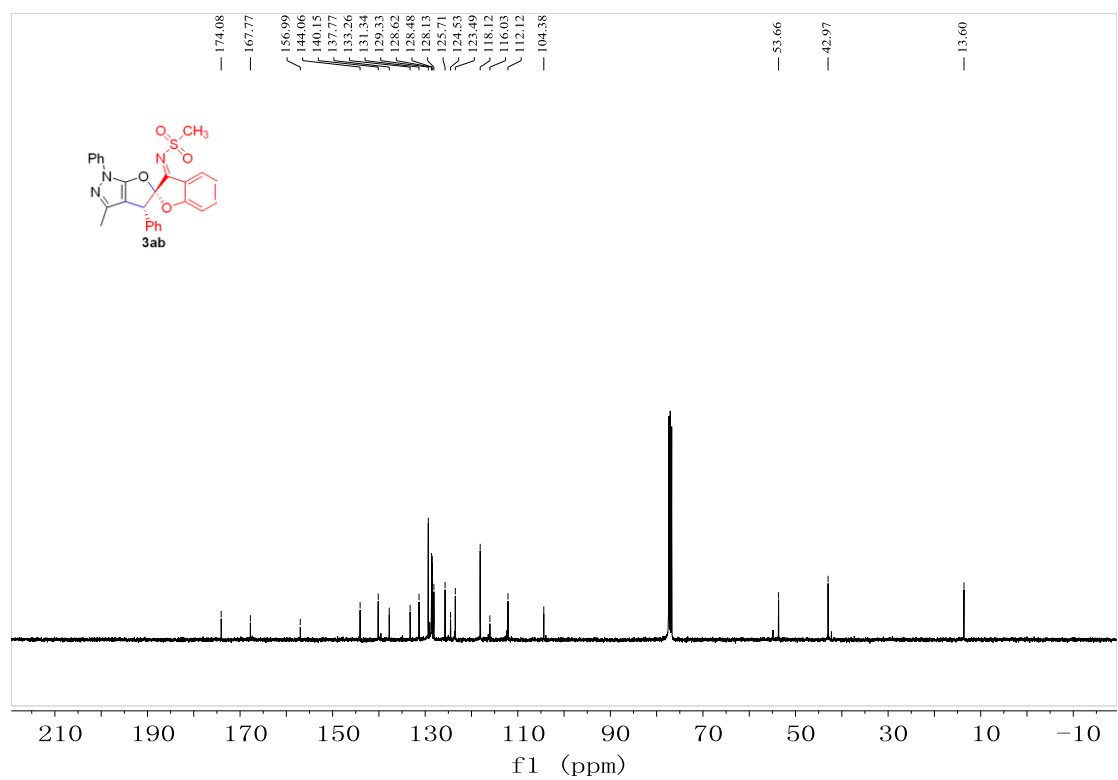

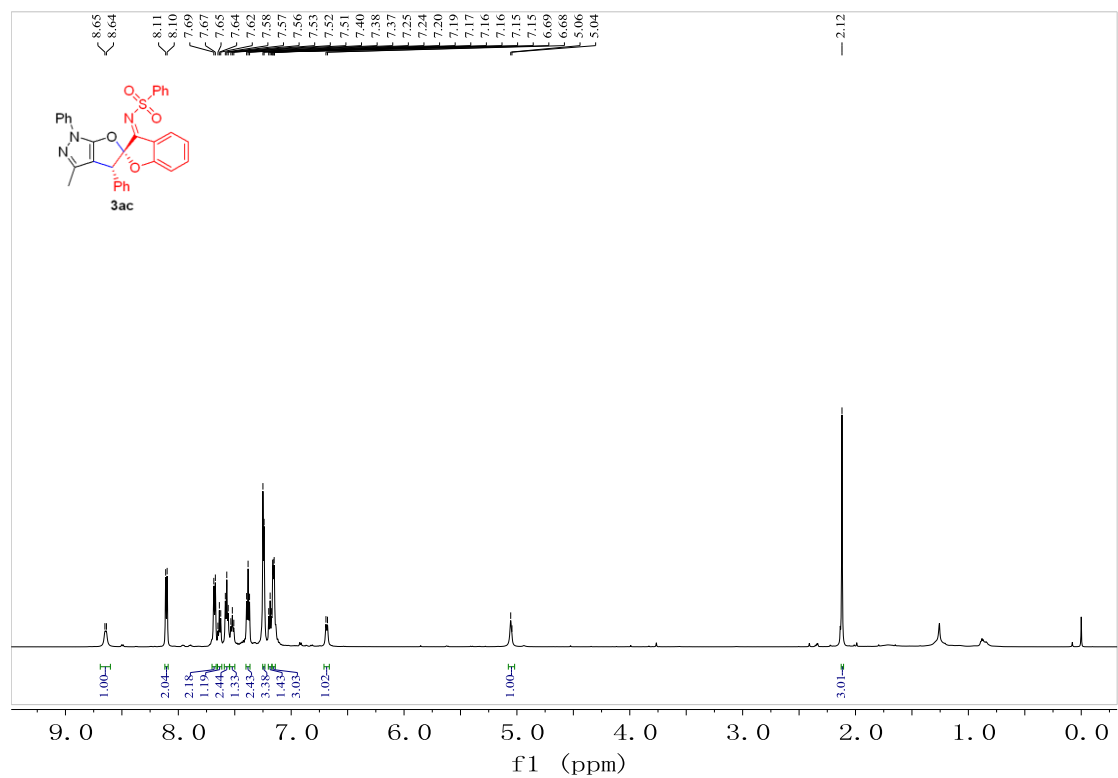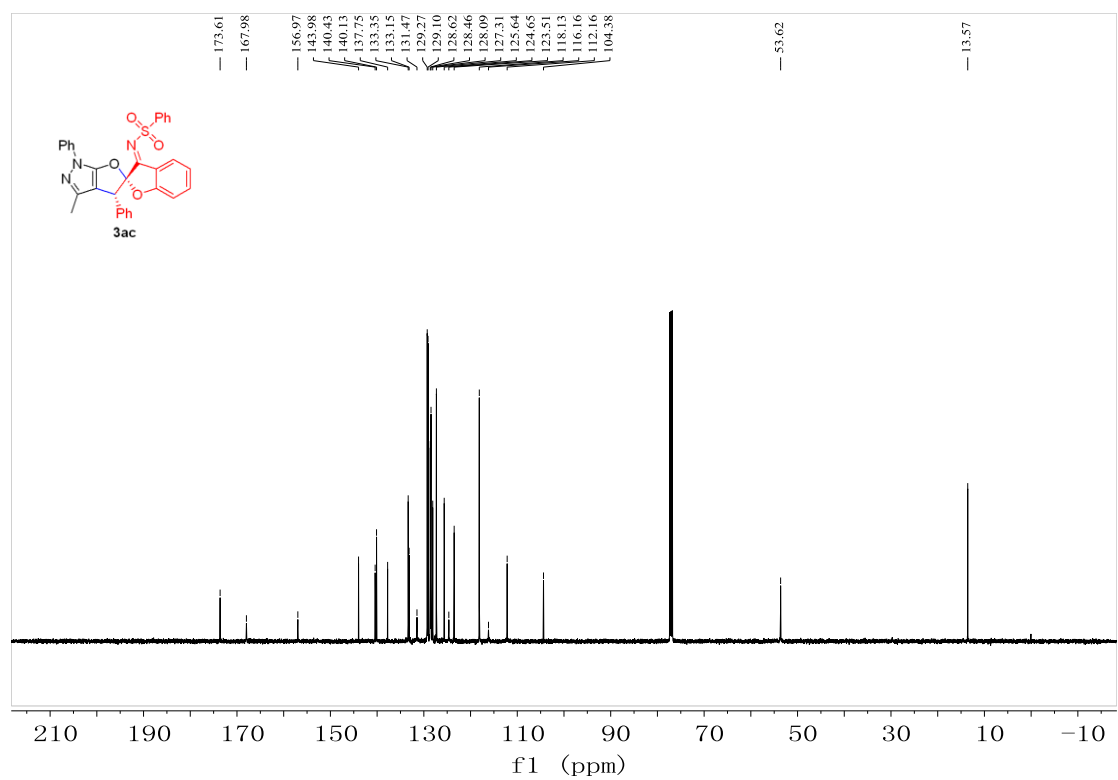

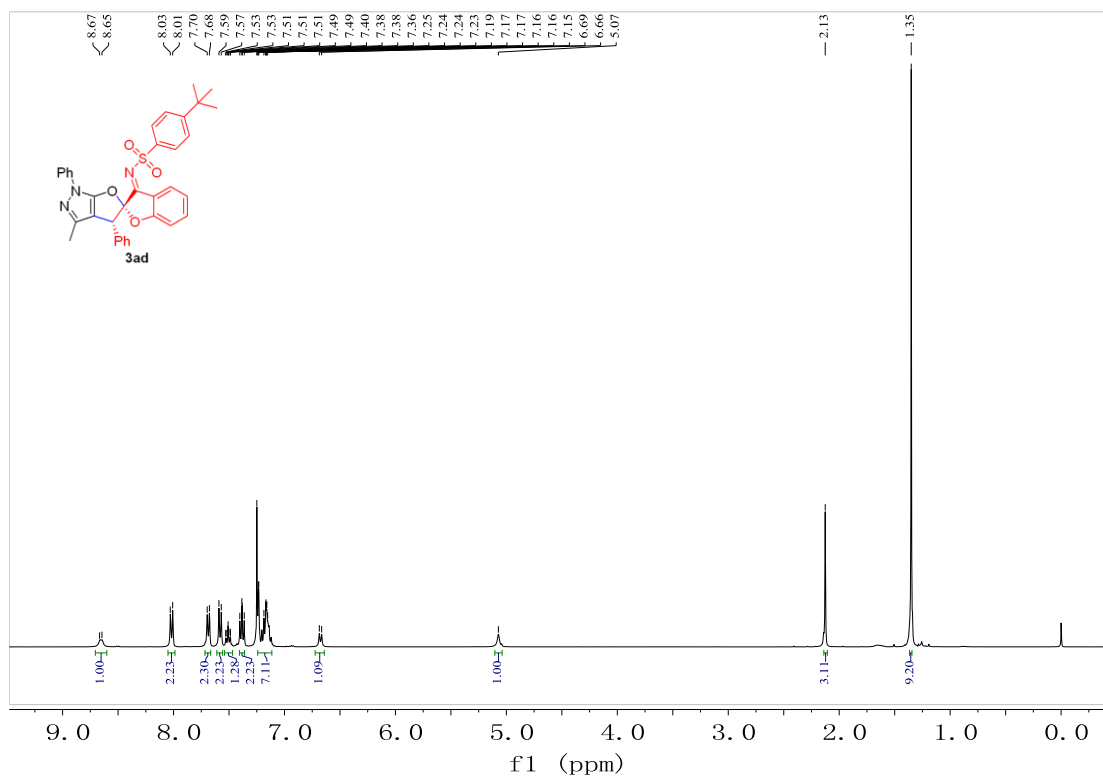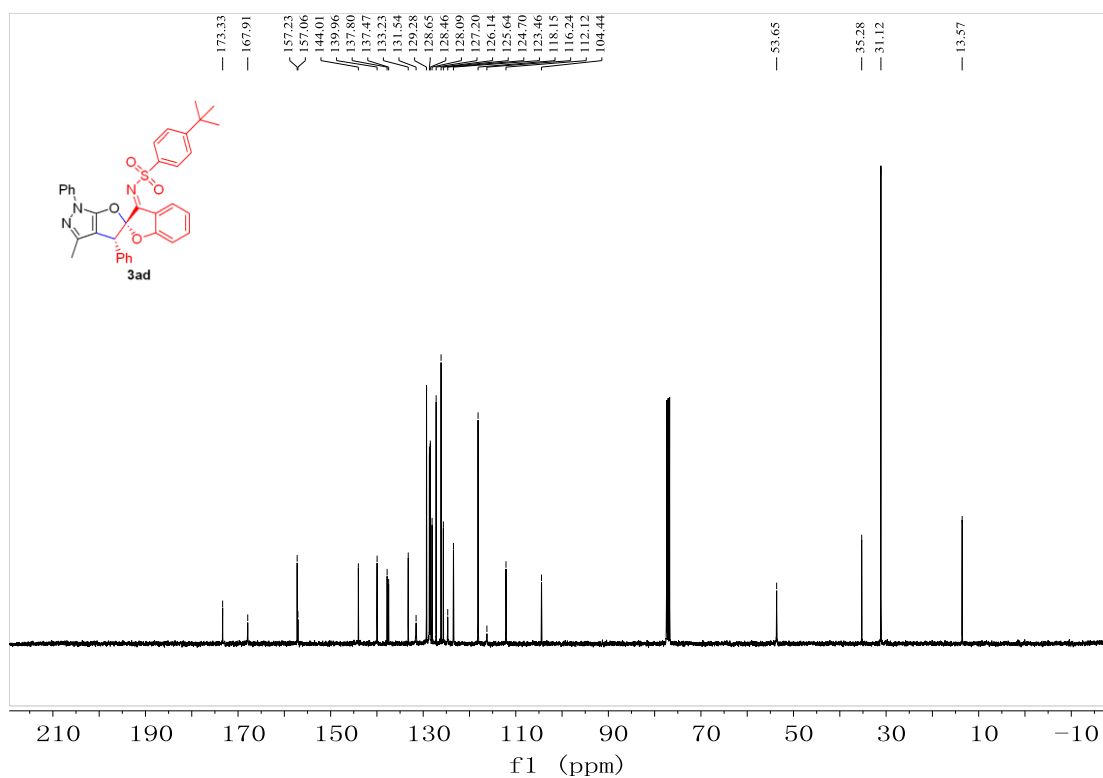

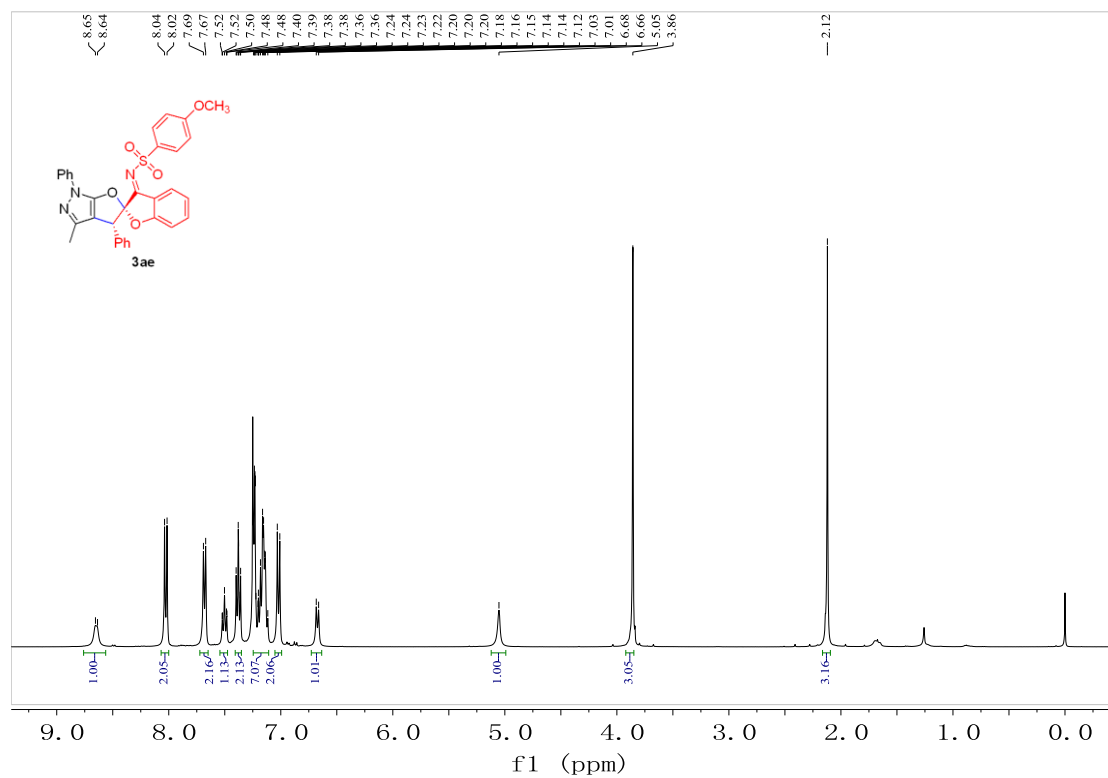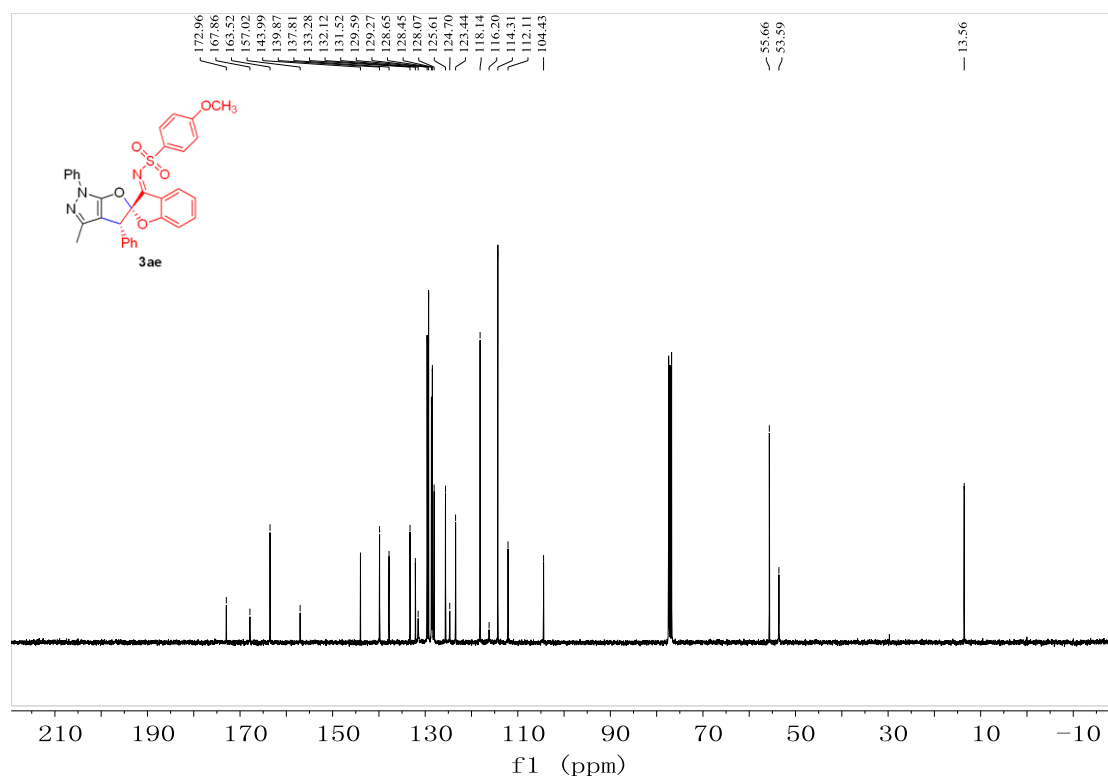

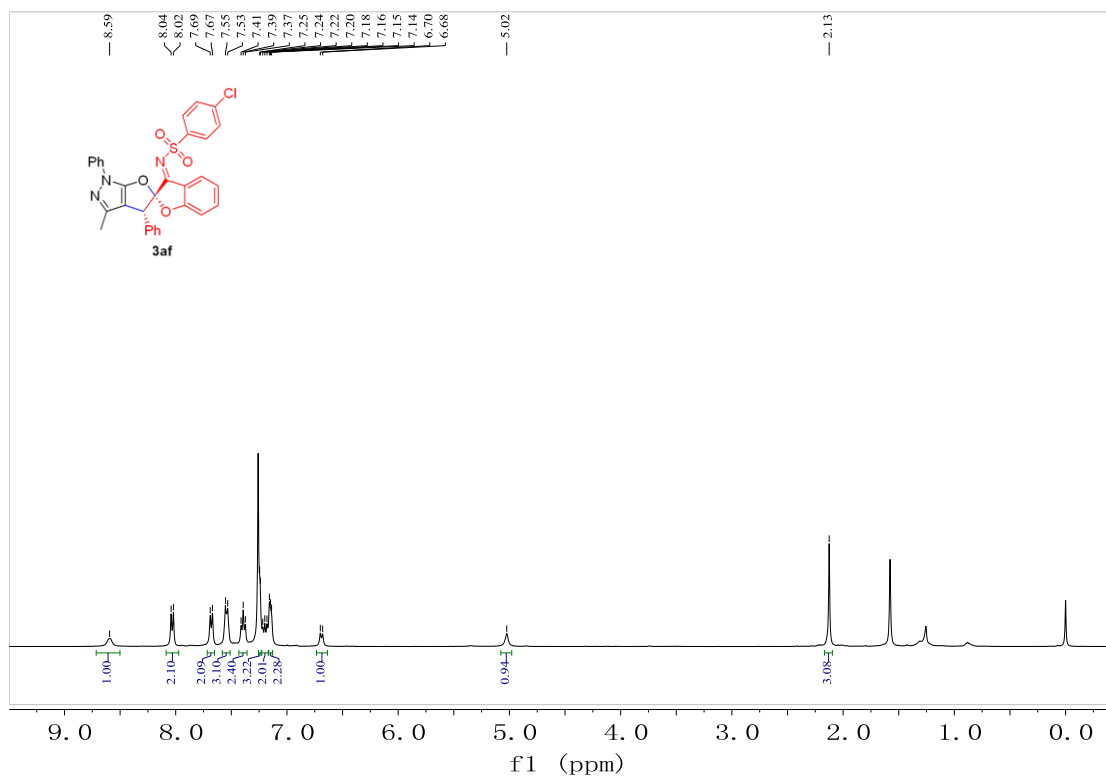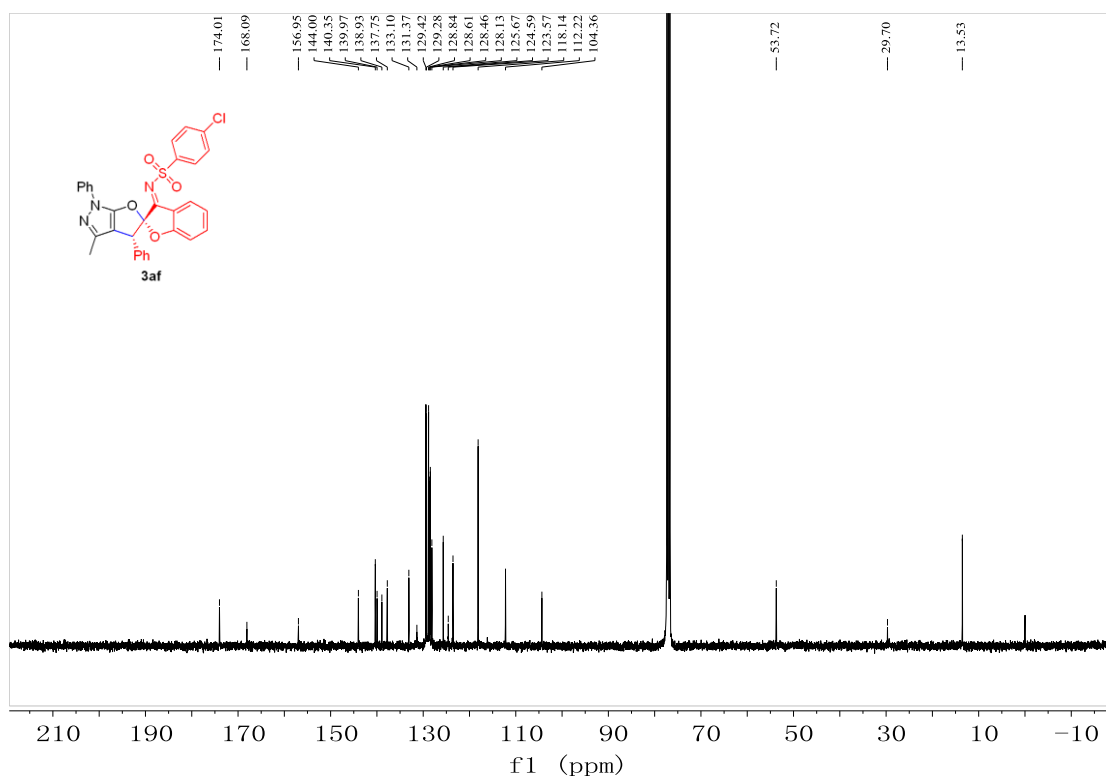



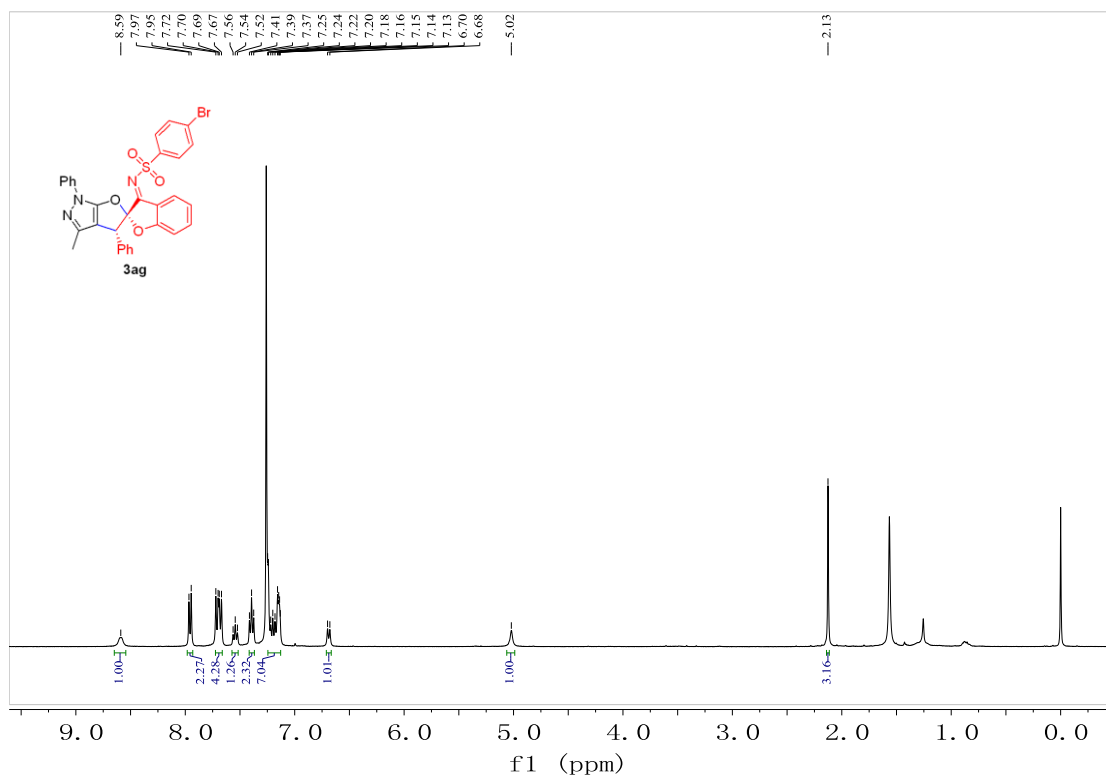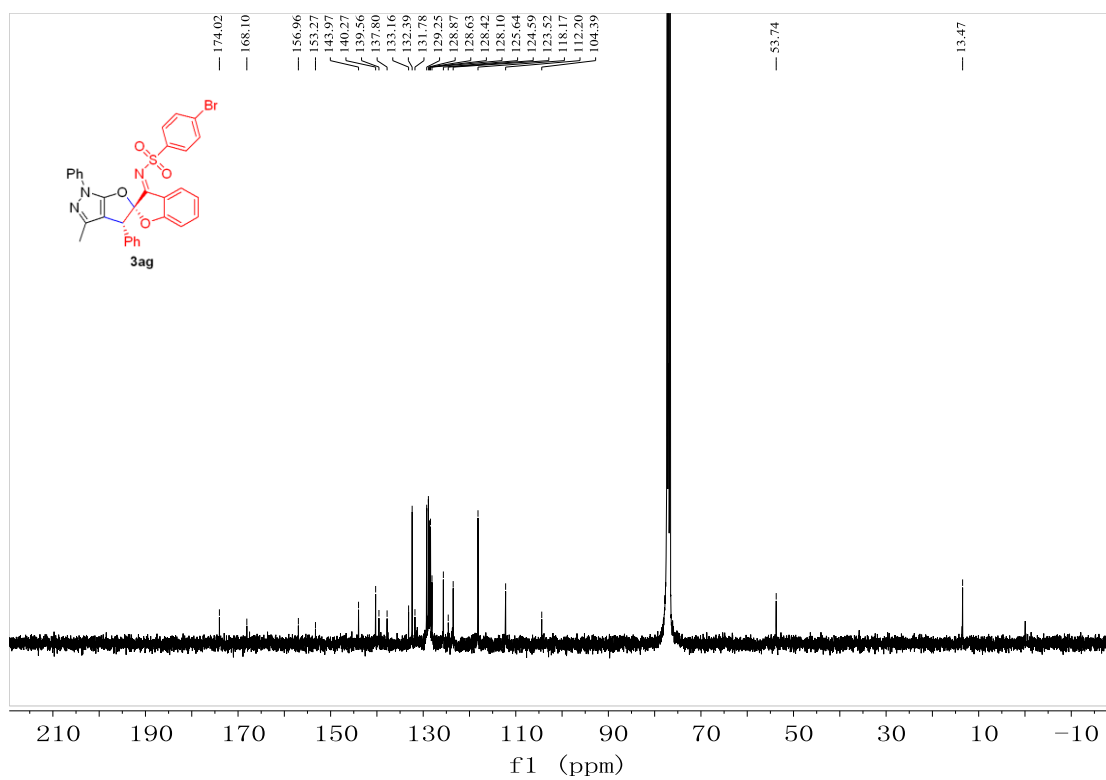

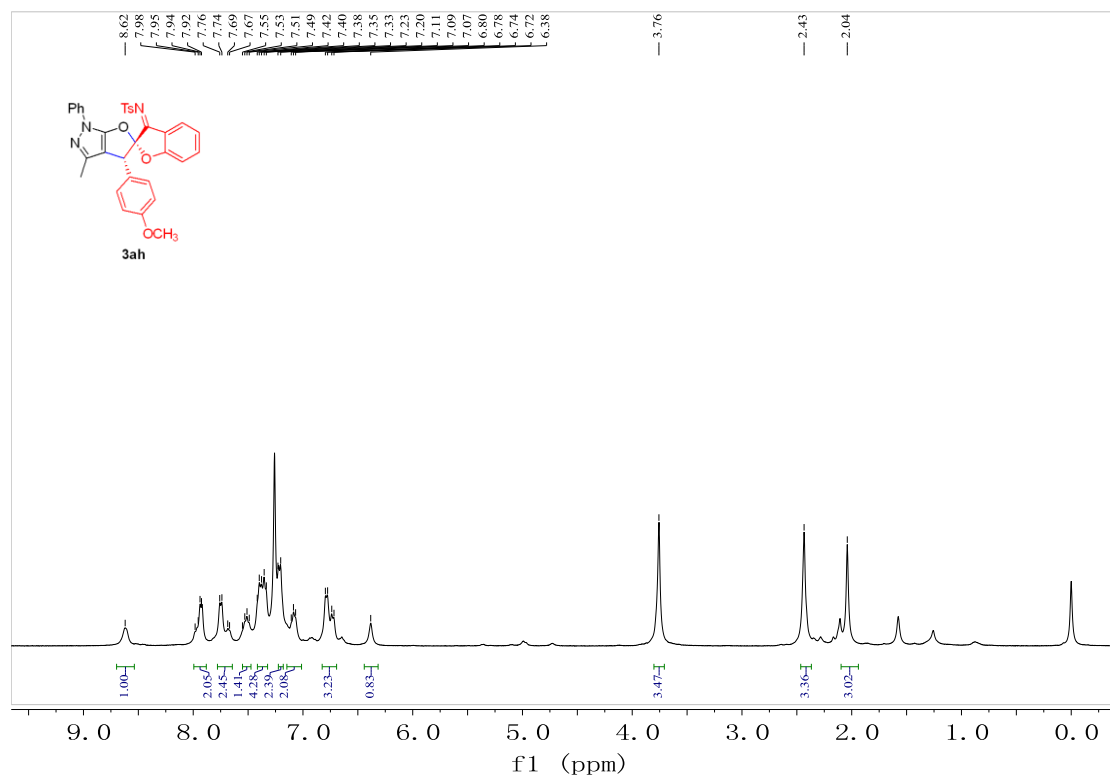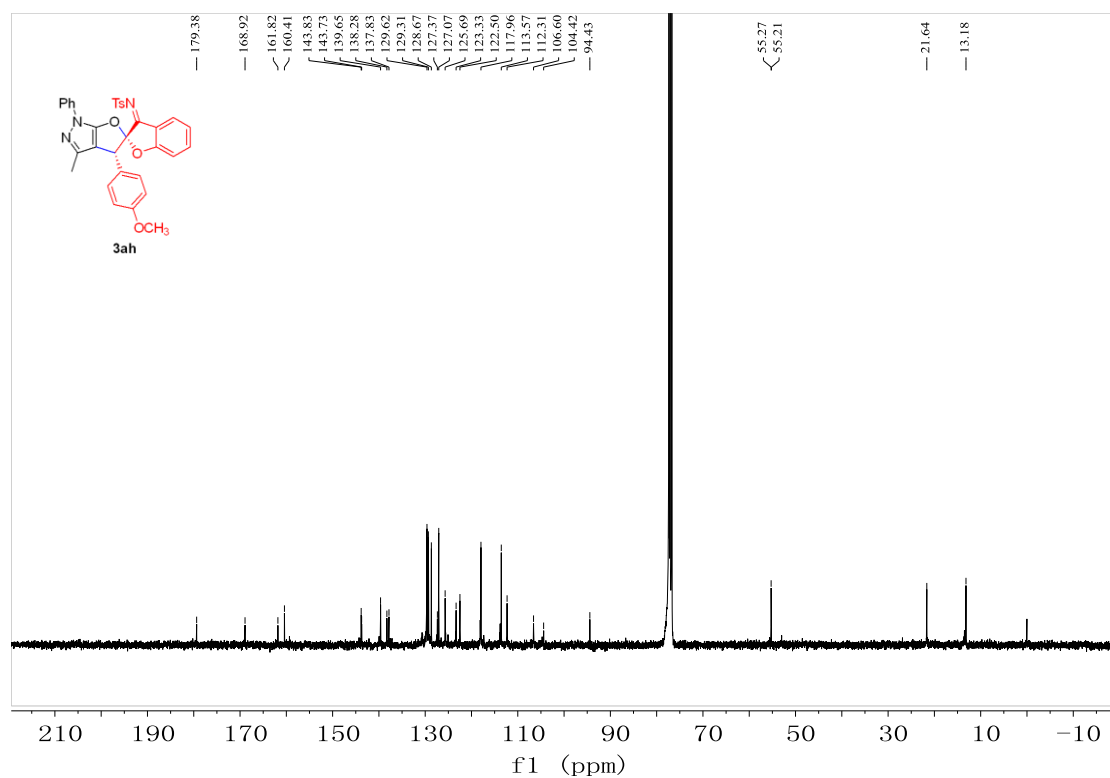

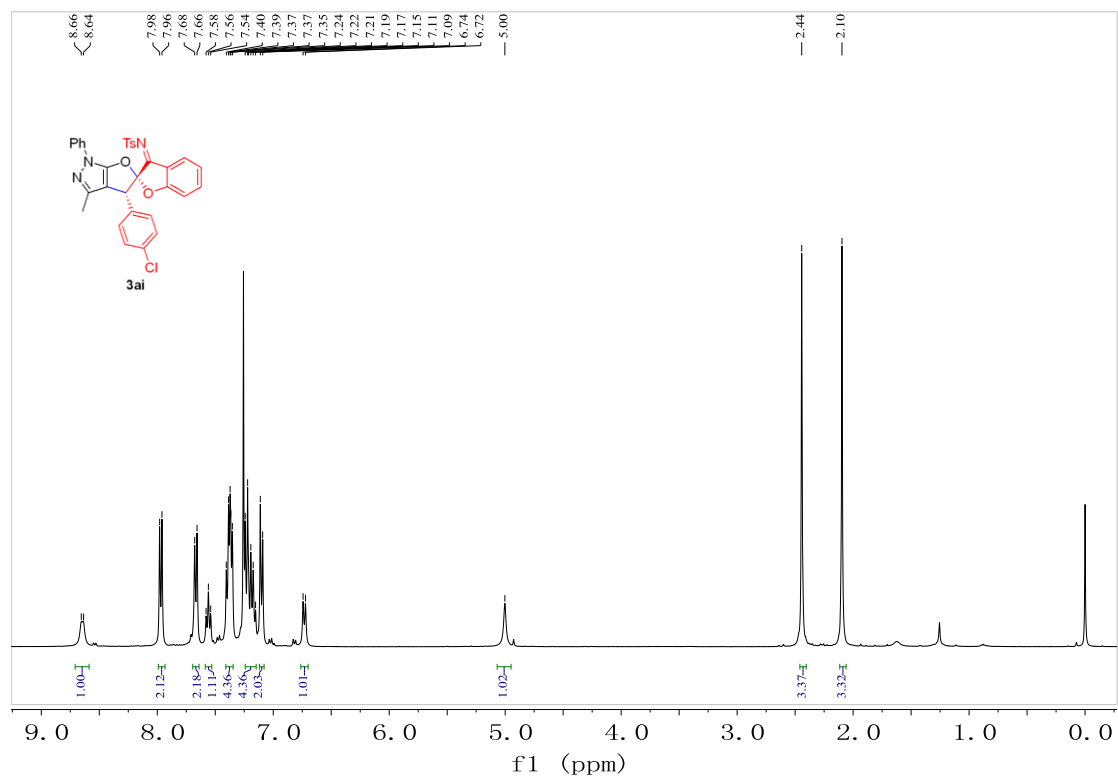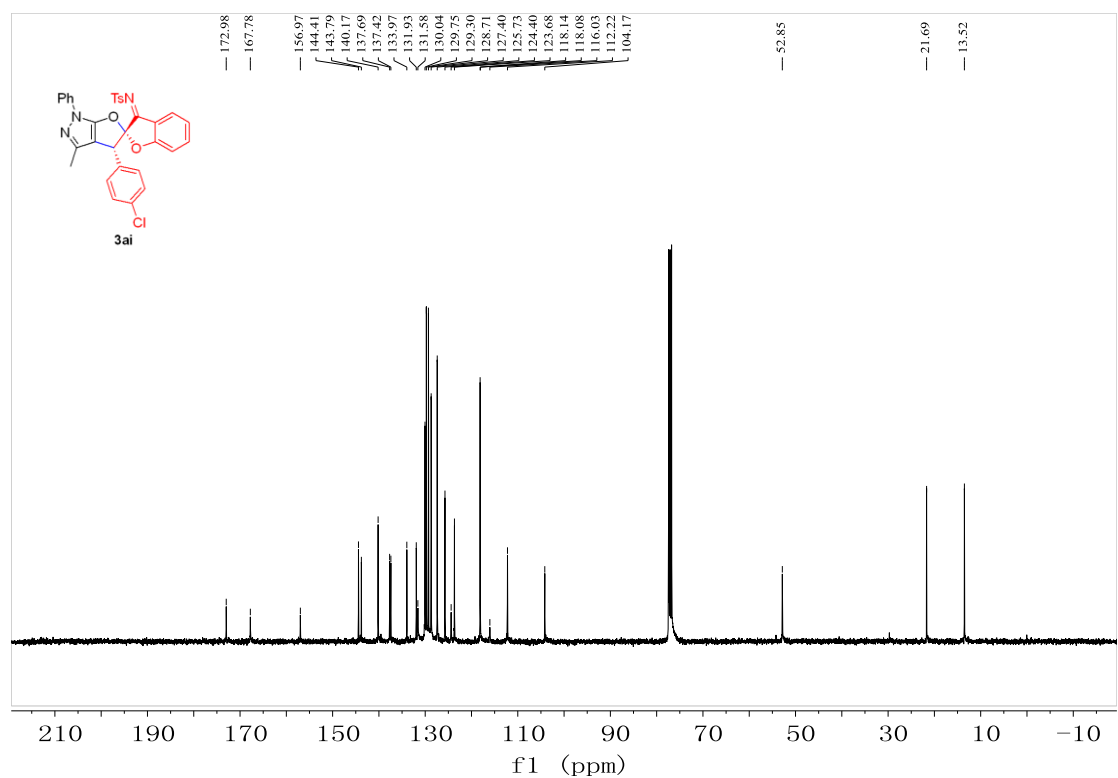

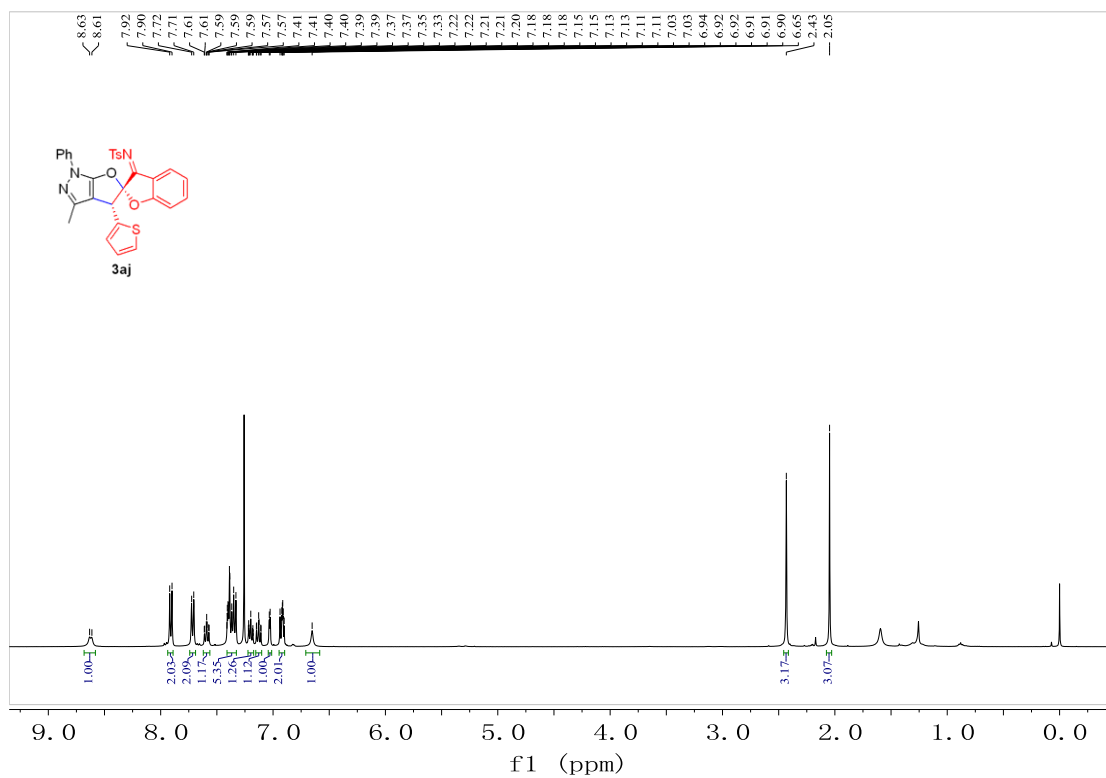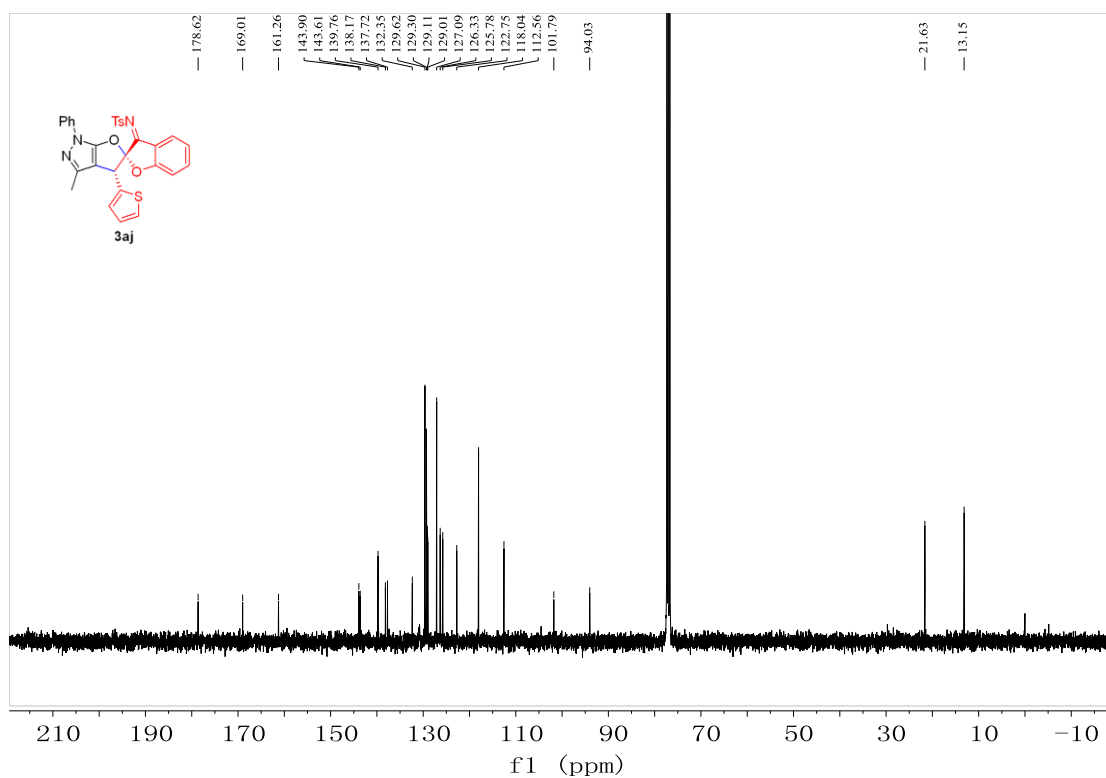

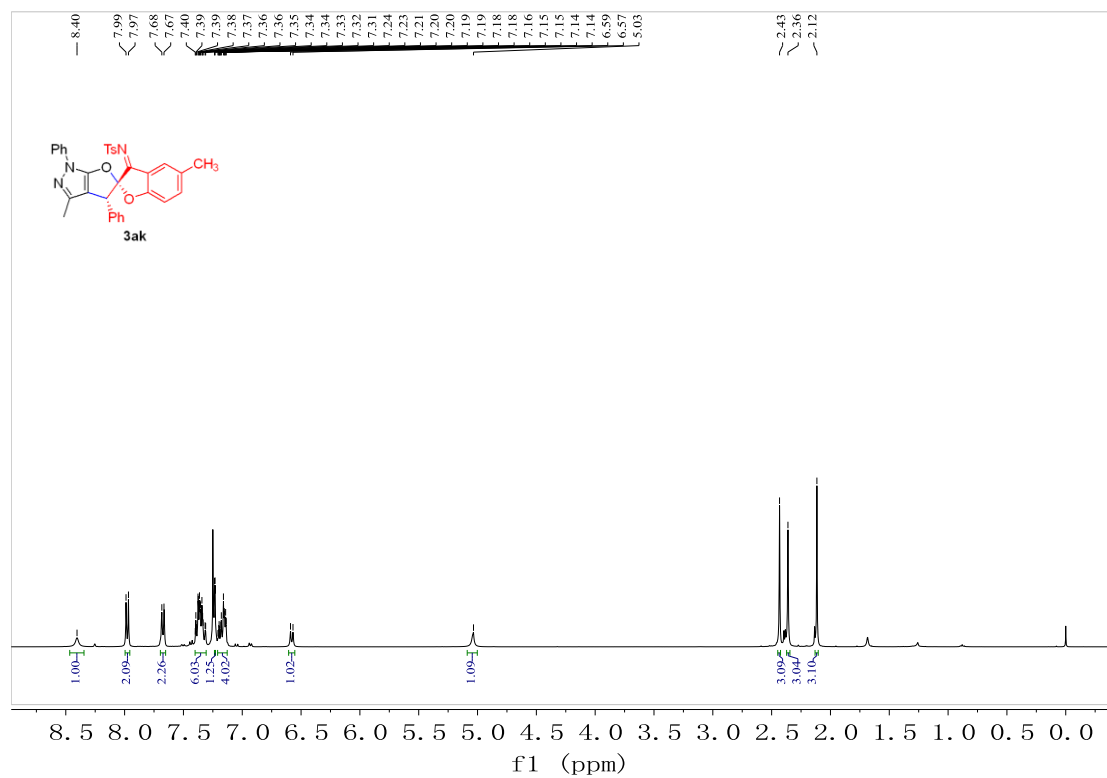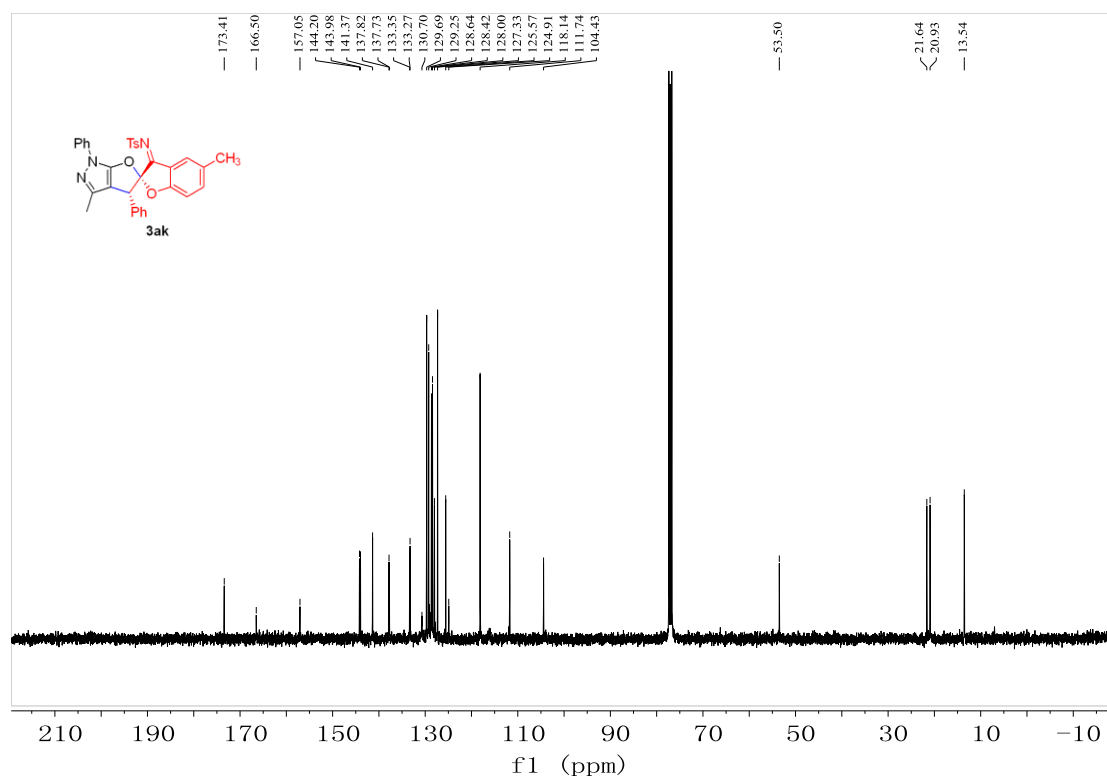

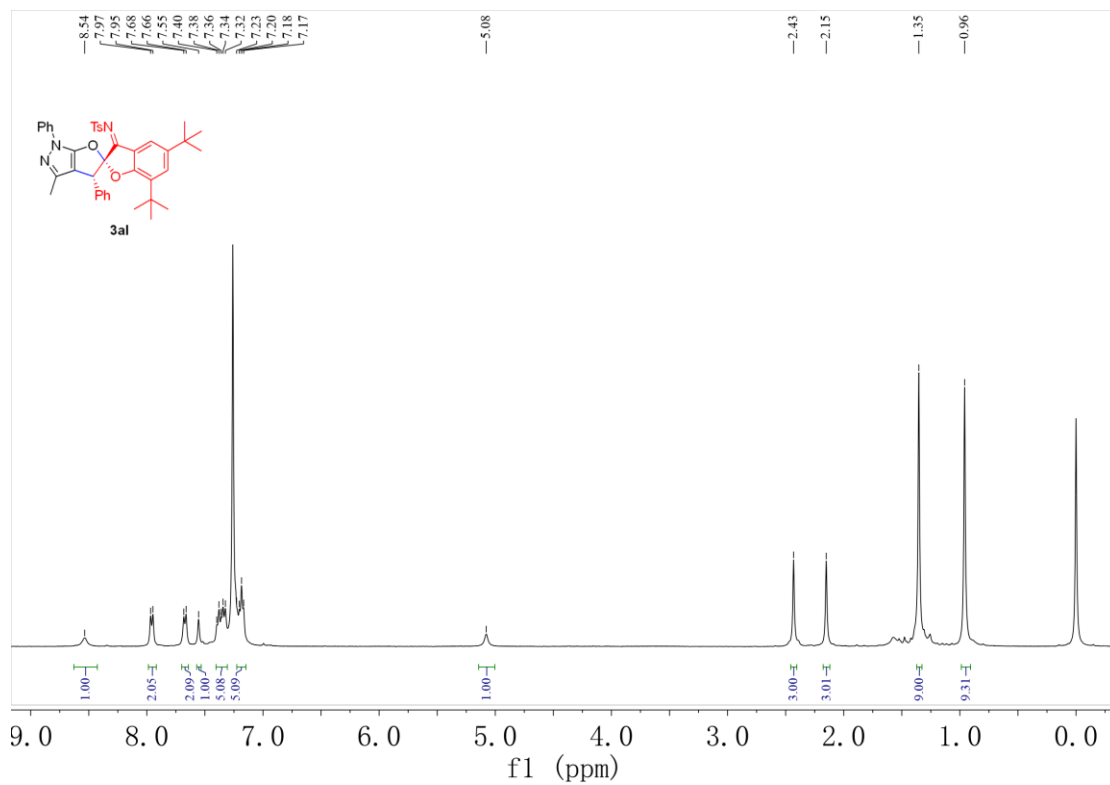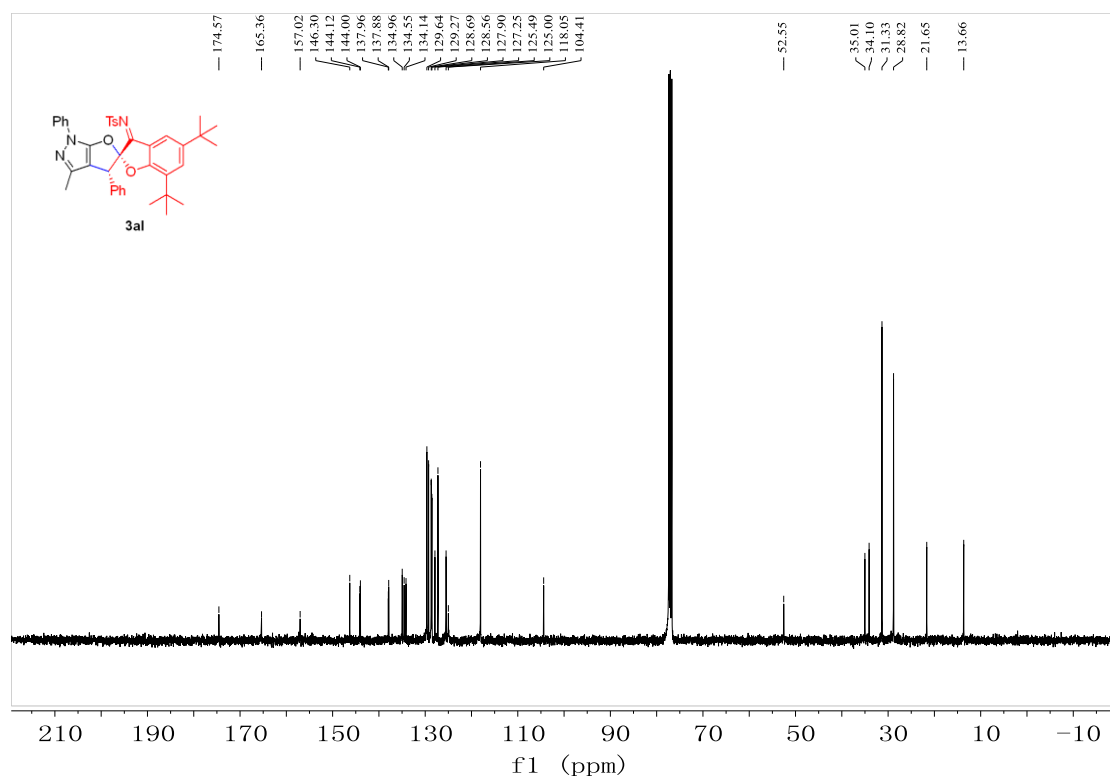

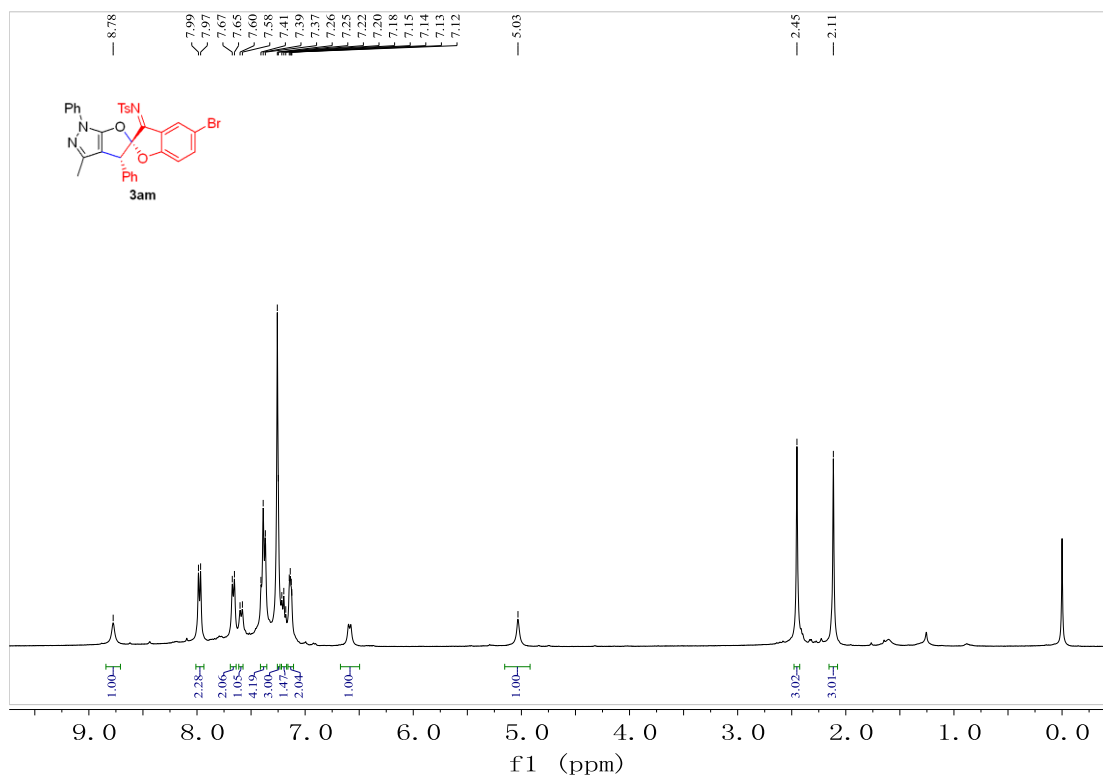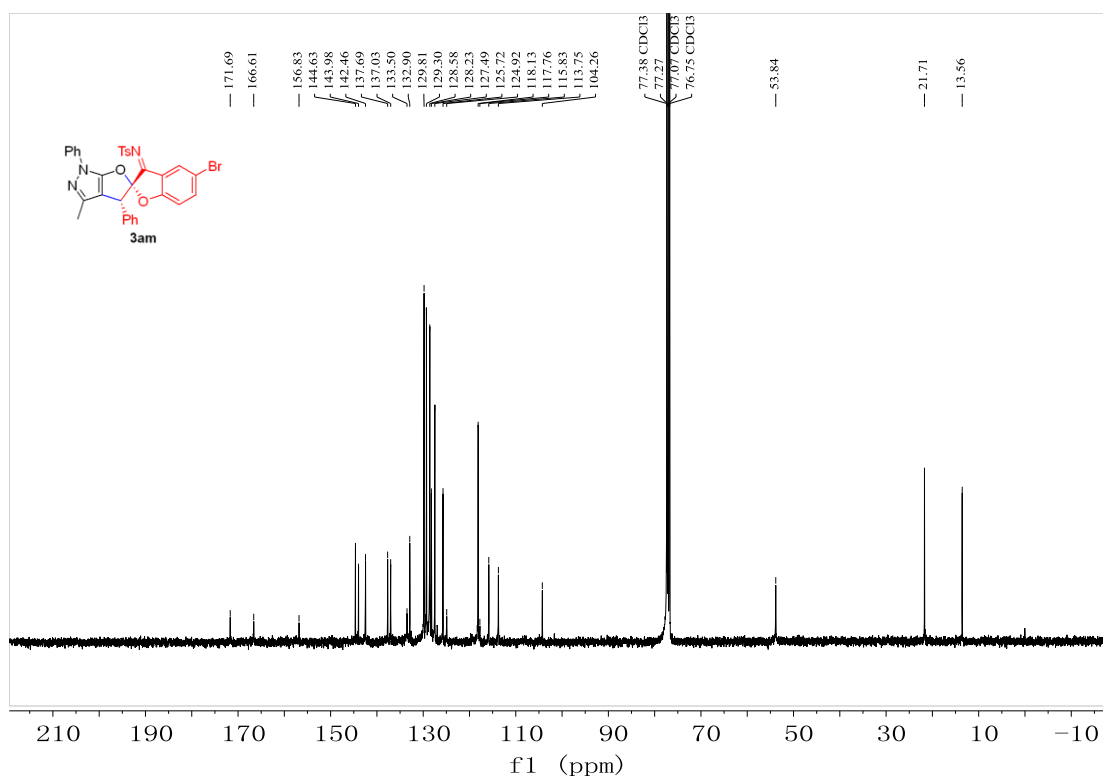

Supplement: d2qo01001a1.pdf [file d2qo01001a1.pdf]
